# CLEAR: Composition of Likelihoods for Evolve And Resequencing Experiments

Arya Iranmehr<sup>1</sup>, Ali Akbari<sup>1</sup>, Christian Schlötterer<sup>2</sup>, and Vineet Bafna<sup>3</sup>

<sup>1</sup>Electrical and Computer Engineering, University of California, San Diego, La Jolla, CA, USA.

<sup>2</sup>Institut für Populationsgenetik, Vetmeduni, Vienna, Austria.

<sup>3</sup>Computer Science and Engineering, University of California, San Diego, La Jolla, CA, USA.

## Abstract

The advent of next generation sequencing technologies has made whole-genome and whole-population sampling possible, even for eukaryotes with large genomes. With this development, experimental evolution studies can be designed to observe molecular evolution “in-action” via Evolve-and-Resequencing (E&R) experiments. Among other applications, E&R studies can be used to locate the genes and variants responsible for genetic adaptation. Existing literature on time-series data analysis often assumes large population size, accurate allele frequency estimates, and wide time spans. These assumptions do not hold in many E&R studies.

In this article, we propose a method—Composition of Likelihoods for Evolve-And-Resequencing experiments (CLEAR)—to identify signatures of selection in small population E&R experiments. CLEAR takes whole-genome sequence of pool of individuals (pool-seq) as input, and properly addresses heterogeneous ascertainment bias resulting from uneven coverage. CLEAR also provides unbiased estimates of model parameters, including population size, selection strength and dominance, while being computationally efficient. Extensive simulations show that CLEAR achieves higher power in detecting and localizing selection over a wide range of parameters, and is robust to variation of coverage. We applied CLEAR statistic to multiple E&R experiments, including, data from a study of *D. melanogaster* adaptation to alternating temperatures and a study of outcrossing yeast populations, and identified multiple regions under selection with genome-wide significance.

## 1 Introduction

Natural selection is a key force in evolution, and a mechanism by which populations can adapt to external ‘selection’ pressure. Examples of adaptation abound in the natural world [22], including for example, classic examples like lactose tolerance in Northern Europeans [9], human adaptation to high altitudes [55, 69], but also drug resistance in pests [15], HIV [24], cancer [27, 70], malarial parasite [3, 44], and others [56]. In these examples, understanding the genetic basis of adaptation can provide valuable information, underscoring the importance of the problem.

Experimental evolution refers to the study of the evolutionary processes of a model organism in a controlled [7, 10, 28, 37, 38, 46, 47] or natural [5, 8, 16, 17, 41, 50, 68] environment. Recent advances in whole genome sequencing have enabled us to sequence populations at a reasonable cost, even for large genomes. Perhaps more important for experimental evolution studies, we can now evolve and resequence (E&R) multiple replicates of a population to obtain *longitudinal time-series data*, in order to investigate the dynamics of evolution at molecular level. Although constraints such as small sizes, limited timescales, and oversimplified laboratory environments may

34 limit the interpretation of E&R results, these studies are increasingly being used to test a wide  
35 range of hypotheses [34] and have been shown to be more predictive than static data analysis  
36 [12, 18, 52]. In particular, longitudinal E&R data is being used to estimate model parameters  
37 including population size [33, 49, 60, 64, 65, 67], strength of selection [11, 29, 30, 40, 43, 57, 60],  
38 allele age [40] recombination rate [60], mutation rate [6, 60], quantitative trait loci [4] and for tests  
39 of neutrality hypotheses [8, 13, 23, 60].

40 While many E&R study designs are being used [6, 53], we restrict our attention to the adaptive  
41 evolution due to standing variation in fixed size populations. This regime has been considered  
42 earlier, typically with *D. melanogaster* as the model organism of choice, to identify adaptive genes  
43 in longevity and aging [13, 51] (600 generations), courtship song [63] (100 generations), hypoxia  
44 tolerance [71] (200 generations), adaptation to new laboratory environments [26, 46] (59 genera-  
45 tions), egg size [32] (40 generations), C virus resistance [42] (20 generations), and dark-fly [31] (49  
46 generations).

47 The task of identifying selection signatures can be addressed at different levels of specificity.  
48 At the coarsest level, identification could simply refer to deciding whether some genomic region (or  
49 a gene) is under selection or not. In the following, we refer to this task as *detection*. In contrast,  
50 the task of *site-identification* corresponds to the process of finding the favored mutation/allele  
51 at nucleotide level. Finally, *estimation of model parameters*, such as strength of selection and  
52 dominance at the site, can provide a comprehensive description of the selection process.

53 In the effort to analyze E&R selection experiments, many authors chose to adapt existing  
54 tests that were originally used for static data, pairwise comparisons (two time-points) and single  
55 replicates to perform a null scan. For instance, Zhu *et al.* [71] used the ratio of the estimated  
56 population size of case and control populations to compute test statistic for each genomic region.  
57 Burke *et al.* [13] applied Fisher exact test to the last observation of data on case and control  
58 populations. Orozco-terWengel *et al.* [46] used the Cochran-Mantel-Haenszel (CMH) test [1] to  
59 detect SNPs whose read counts change consistently across all replicates of two time-point data.  
60 Turner *et al.* [63] proposed the diffStat statistic to test whether the change in allele frequencies  
61 of two populations deviate from the distribution of change in allele frequencies of two drifting  
62 populations. Bergland *et al.* [8] calculated  $F_{st}$  to populations throughout time to signify their  
63 differentiation from ancestral (two time-point data) as well as geographically different populations.  
64 Jha *et al.* [32] computed test statistic of generalized linear-mixed model directly from read counts.

65 Alternatively, *direct* methods have been developed to analyze time-series data by taking a  
66 likelihood approach, and estimating population genetics parameters. Bollback *et al.* [11] proposed  
67 a Hidden Markov Model (HMM) to estimate the selection coefficient  $s$  and population size by  
68 using a diffusion approximation to the continuous Wright Fisher Markov process. Steinrücken and  
69 Song [57] proposed a general diploid selection model which takes into account of dominance of  
70 the favored allele and approximates likelihood analytically. Mathieson and McVean [43] adopted  
71 HMMs to structured populations and estimated parameters using an Expectation Maximization  
72 (EM) procedure on discretized allele frequency. Feder *et al.* [23] modeled increments in allele  
73 frequency with a Brownian motion process, proposed the Frequency Increment Test (FIT). More  
74 recently, Topa *et al.* [62] proposed a Gaussian Process (GP) for modeling single-locus time-series  
75 pool-seq data. Terhorst *et al.* [60] extended GP to compute joint likelihood of multiple loci under  
76 null and alternative hypotheses. Recently, Schraiber *et al.* [54] proposed a Bayesian framework to  
77 estimate parameters using Monte Carlo Markov chain sampling.

78 While existing methods have been successfully applied to their corresponding application, they  
79 make some assumptions which may not hold in E&R studies. First, they assume that the underlying  
80 population size is large, so it is reasonable to model dynamics of allele frequencies using continuous  
81 state models. A number of existing methods were originally designed to process wide time spans

82 such as ancient DNA studies. Finally, they assume that input data is in the form of unbiased allele  
83 frequencies, which may not be valid for shotgun sequencing experiments.

84 Here, we consider a Hidden Markov Model (HMM), similar to Williamson *et al.* [67] and Boll-  
85 back *et al.*'s [11] but under a “small-population-size” regime. Specifically, we use a discrete state  
86 (frequency) model. We show that for small population sizes, discrete models can compute likeli-  
87 hood exactly, which improves statistical performance, especially for short time-span experiments.  
88 Additionally, we add another level of sampling-noise to the traditional HMM model, allowing for  
89 heterogeneous ascertainment bias due to uneven coverage among variants. We show that for a wide  
90 range of parameters, CLEAR provides higher power for detecting selection, estimates model pa-  
91 rameters consistently, and localizes favored allele more accurately compared to the state-of-the-art  
92 methods, while being computationally efficient.

## 93 2 Materials and Methods

94 Consider a panmictic diploid population with fixed size of  $N$  individuals. Let  $\nu = \{\nu_t\}_{t \in \mathcal{T}}$  be  
95 frequencies of the derived allele at generations  $t \in \mathcal{T}$  for a given variant, where at generations  
96  $\mathcal{T} = \{\tau_i : 0 \leq \tau_0 < \tau_1, \dots < \tau_T\}$  samples of  $n$  individuals are chosen for pooled sequencing. The  
97 experiment is replicated  $R$  times. We denote allele frequencies of the  $R$  replicates by the set  $\{\nu\}_R$ .  
98 To identify the genes and variants that are responding to selection pressure, we use the following  
99 procedure:

- 100 (i) **Estimating population size.** The procedure starts by estimating the effective population  
101 size,  $\hat{N}$ , under the assumption that much of the genome is evolving neutrally.
- 102 (ii) **Estimating selection parameters.** For each polymorphic site, selection and dominance  
103 parameters  $s, h$  are estimated so as to maximize the likelihood of the time series data, given  
104  $\hat{N}$ .
- 105 (iii) **Computing likelihood statistics.** For each variant, a log-odds ratio of the likelihood  
106 of selection model ( $s > 0$ ) to the likelihood of neutral evolution/drift model is computed.  
107 Likelihood ratios in a genomic region are combined to compute the CLEAR statistic for the  
108 region.
- 109 (iv) **Hypothesis testing.** An empirical null distribution of the CLEAR statistic is calculated using  
110 genome-wide drift simulations, and used to compute  $p$ -values and thresholds for a specified  
111 FDR. We perform single locus hypothesis testing within selected regions to identify significant  
112 variants and report genes that intersect with the selected variants.

113 These steps are described in detail below.

### 114 2.1 Estimating Population Size

115 Methods for estimating population sizes from temporal neutral evolution data have been devel-  
116 oped [2, 11, 33, 60, 67]. Here, we aim to extend these models to explicitly model the sampling noise  
117 that arise in pool-seq data. Specifically, we model the variation in sequence coverage over different  
118 locations, and the noise due to sequencing only a subset of the individuals in the population. In  
119 addition, many existing methods [11, 23, 60, 62] are designed for large populations, and model  
120 frequency as a continuous quantity. We show that smooth approximations may be inadequate for  
121 small populations, low starting frequencies and sparse sampling (in time) that are typical in ex-  
122 perimental evolution (see Results, Fig 3A-C, and Fig 2). To this end, we model the Wright-Fisher

123 Markov process for generating pool-seq data (Fig S1) via a discrete HMM ( Fig 1-B). We start by  
 124 computing a likelihood function for the population size given neutral pool-seq data.

125 **Likelihood for Neutral Model.** We model the allele frequency counts  $2N\nu_t$  as being sampled  
 126 from a Binomial distribution. Specifically,

$$\begin{aligned}\nu_0 &\sim \pi, \\ 2N\nu_t|\nu_{t-1} &\sim \text{Binomial}(2N, \nu_{t-1})\end{aligned}$$

127 where  $\pi$  is the global distribution of allele frequencies in the base population. Here we simply  
 128 assume  $\pi$  is the site frequency spectrum of fixed sized neutral population Fig S2. Note that  $\pi$   
 129 may depend on the demographic history of the founder lines.

130 To estimate frequency after  $\tau$  transitions, it is enough to specify the  $2N \times 2N$  transition matrix  
 131  $P^{(\tau)}$ , where  $P^{(\tau)}[i, j]$  denotes probability of change in allele frequency from  $i/2N$  to  $j/2N$  in  $\tau$   
 132 generations:

$$P^{(1)}[i, j] = \Pr\left(\nu_{t+1} = \frac{j}{2N} \mid \nu_t = \frac{i}{2N}\right) = \binom{2N}{j} \nu_t^j (1 - \nu_t)^{2N-j}, \quad (1)$$

$$P^{(\tau)} = P^{(\tau-1)}P^{(1)} \quad (2)$$

133 Furthermore, in an E&R experiment,  $n \leq N$  individuals are randomly selected for sequencing. The  
 134 sampled allele frequencies,  $\{y_t\}_{t \in \mathcal{T}}$ , are also Binomially distributed

$$2ny_t \sim \text{Binomial}(2n, \nu_t) \quad (3)$$

135 We introduce the  $2N \times 2n$  sampling matrix  $Y$ , where  $Y[i, j]$  stores the probability that the sample  
 136 allele frequency is  $j/2n$  given that the true allele frequency is  $i/2N$ .

137 We denote the pool-seq data for that variant as  $\{x_t = \langle c_t, d_t \rangle\}_{t \in \mathcal{T}}$  where  $d_t, c_t$  represent the  
 138 coverage, and the read count of the derived allele, respectively. Let  $\{\lambda_t\}_{t \in \mathcal{T}}$  be the sequencing  
 139 coverage at different generations. Then, the observed data are sampled according to

$$d_t \sim \text{Poisson}(\lambda_t), \quad c_t \sim \text{Binomial}(d_t, y_t) \quad (4)$$

140 The emission probability for a observed tuple  $x_t = \langle d_t, c_t \rangle$  is

$$\mathbf{e}_i(x_t) = \binom{d_t}{c_t} \left(\frac{i}{2n}\right)^{c_t} \left(1 - \frac{i}{2n}\right)^{d_t - c_t}. \quad (5)$$

For  $1 \leq t \leq T, 1 \leq j \leq 2N$ , let  $\alpha_{t,j}$  denote the probability of emitting  $x_1, x_2, \dots, x_t$  and reaching  
 state  $j$  at  $\tau_t$ . Then,  $\alpha_t$  can be computed using the forward-procedure [19]:

$$\alpha_t^T = \alpha_{t-1}^T P^{(\delta_t)} \text{diag}(Y \mathbf{e}(x_t)) \quad (6)$$

141 where  $\delta_t = \tau_t - \tau_{t-1}$ . The joint likelihood of the observed data from  $R$  independent observations is  
 142 given by

$$\mathcal{L}(N|\{\mathbf{x}\}_R, n) = \prod_{r=1}^R \mathcal{L}(N|\mathbf{x}^{(r)}, n) = \Pr(\{\mathbf{x}\}_R|N, n) = \prod_{r=1}^R \sum_i \alpha_{T,i}^{(r)} \quad (7)$$

143 where  $\mathbf{x} = \{x_t\}_{t \in \mathcal{T}}$ . The graphical model and the generative process for which data is being  
 144 generated is depicted in Fig 1-B and Fig S1, respectively.

145 Finally, the last step is to compute an estimate  $\hat{N}$  that maximizes the likelihood of all  $M$   
 146 variants in whole genome. Let  $\mathbf{x}_i^{(r)}$  denote the time-series data of the  $i$ -th variant in replicate  $r$ .  
 147 Then,

$$\hat{N} = \arg \max_N \prod_{i=1}^M \prod_{r=1}^R \mathcal{L}(N|\mathbf{x}_i^{(r)}) \quad (8)$$

## 148 2.2 Estimating Selection Parameters

149 **Likelihood for Selection Model.** Assume that the site is evolving under selection constraints  
 150  $s \in \mathbb{R}$ ,  $h \in \mathbb{R}_+$ , where  $s$  and  $h$  denote selection strength and dominance parameters, respectively.  
 151 By definition, the relative fitness values of genotypes 0|0, 0|1 and 1|1 are given by  $w_{00} = 1$ ,  
 152  $w_{01} = 1 + hs$  and  $w_{11} = 1 + s$ . Then,  $\nu_{t+}$ , the frequency at time  $\tau_t + 1$  (one generation ahead), can  
 153 be estimated using:

$$\begin{aligned} \hat{\nu}_{t+} = \mathbb{E}[\nu_{t+} | s, h, \nu_t] &= \frac{w_{11}\nu_t^2 + w_{01}\nu_t(1 - \nu_t)}{w_{11}\nu_t^2 + 2w_{01}\nu_t(1 - \nu_t) + w_{00}(1 - \nu_t)^2} \\ &= \nu_t + \frac{s(h + (1 - 2h)\nu_t)\nu_t(1 - \nu_t)}{1 + s\nu_t(2h + (1 - 2h)\nu_t)}. \end{aligned} \quad (9)$$

154 The machinery for computing likelihood of the selection parameters is identical to that of population  
 155 size, except for transition matrices. Hence, here we only describe the definition transition matrix  
 156  $Q_{s,h}$  of the selection model. Let  $Q_{s,h}^{(\tau)}[i, j]$  denote the probability of transition from  $i/2N$  to  $j/2N$   
 157 in  $\tau$  generations, then (See [20], Pg. 24, Eqn. 1.58-1.59):

$$Q_{s,h}^{(1)}[i, j] = \Pr\left(\nu_{t+} = \frac{j}{2N} \mid \nu_t = \frac{i}{2N}; s, h, N\right) = \binom{2N}{j} \hat{\nu}_{t+}^j (1 - \hat{\nu}_{t+})^{2N-j} \quad (10)$$

$$Q_{s,h}^{(\tau)} = Q_{s,h}^{(\tau-1)} Q_{s,h}^{(1)} \quad (11)$$

158 The maximum likelihood estimates are given by

$$\hat{s}, \hat{h} = \arg \max_{s,h} \prod_{r=1}^R \mathcal{L}(s, h | \mathbf{x}^{(r)}, \hat{N}) \quad (12)$$

159 Using grid search, we first estimate  $N$  (Eq. 8), and subsequently, we estimate parameters  $s, h$   
 160 (Eq. 12, Fig S3). By broadcasting and vectorizing the grid search operations across all variants, the  
 161 genome scan on millions of polymorphisms can be done in significantly smaller time than iterating  
 162 a numerical optimization routine for each variant (see Results and Fig 4).

## 163 2.3 Empirical Likelihood Ratio Statistics

164 The likelihood ratio statistic for testing directional selection, to be computed for each variant, is  
 165 given by

$$H = -2 \log \left( \frac{\mathcal{L}(\bar{s}, 0.5 | \{\mathbf{x}\}_R, \hat{N})}{\mathcal{L}(0, 0.5 | \{\mathbf{x}\}_R, \hat{N})} \right), \quad (13)$$

166 where  $\bar{s} = \arg \max_s \prod_{r=1}^R \mathcal{L}(s, 0.5 | \mathbf{x}^{(r)}, \hat{N})$ . Similarly we can define a test statistic for testing if  
 167 selection is dominant by

$$D = -2 \log \left( \frac{\mathcal{L}(\hat{s}, \hat{h} | \{\mathbf{x}\}_R, \hat{N})}{\mathcal{L}(\bar{s}, 0.5 | \{\mathbf{x}\}_R, \hat{N})} \right). \quad (14)$$

168 While extending the single-locus WF model to a multiple linked-loci can improve the power of  
 169 the model [60], it is computationally and statistically expensive to compute exact likelihood. In  
 170 addition, computing linked-loci joint likelihood requires haplotype resolved data, which pool-seq

171 does not provide. Here, similar to Nielsen *et al* [45], we calculate *composite likelihood ratio* score  
172 for a genomic region.

$$\mathcal{H} = \frac{1}{|L|} \sum_{\ell \in L} H_{\ell}. \quad (15)$$

173 where  $L$  is a collection of segregating sites and  $H_{\ell}$  is the likelihood ratio score based for each  
174 variant  $\ell$  in  $L$ . The optimal value of the hyper-parameter  $L$  depends upon a number of factors,  
175 including initial frequency of the favored allele, recombination rates, linkage of the favored allele  
176 to neighboring variants, population size, coverage, and time since the onset of selection (duration  
177 of the experiment). In [S1 Text](#), we provide a heuristic to compute a reasonable value of  $L$ , based  
178 on experimental data.

179 We work with a normalized value of  $\mathcal{H}$ , given by

$$\mathcal{H}_i^* = \frac{\mathcal{H}_i - \mu_{\mathcal{C}}}{\sigma_{\mathcal{C}}}, \quad \forall i \in \mathcal{C}, \quad (16)$$

180 where  $\mu_{\mathcal{C}}$  and  $\sigma_{\mathcal{C}}$  are the mean and standard deviation of  $\mathcal{H}$  values in a large region  $\mathcal{C}$ . We found  
181 different chromosomes to have different distribution of  $\mathcal{H}_i$  values, and therefore decided to use single  
182 chromosomes as  $\mathcal{C}$ .

## 183 2.4 Hypothesis Testing

184 **Single-Locus tests.** Under neutrality, Log-likelihood ratios can be approximated by  $\chi^2$  distri-  
185 bution [66], and  $p$ -values can be computed directly. However, Feder *et al.* [23] showed that when  
186 the number of independent samples (replicates) is small,  $\chi^2$  is a crude approximation to the true  
187 null distribution and results in more false positive. Following their suggestion, we first compute the  
188 empirical null distribution using simulations with the estimated population size (See [Fig S1](#)). The  
189 empirical null distribution of statistic  $H$  is used to compute  $p$ -values as the fraction of null values  
190 that exceed the test score. Finally, we use Storey and Tibshirani’s method [59] to control for False  
191 Discovery Rate in multiple testing.

192 **Composite likelihood tests.** Similar to single-locus tests, we compute the null distribution of the  
193  $\mathcal{H}^*$  statistic using whole-genome simulations with the estimated population size, and subsequently  
194 compute FDR. The simulations for generating the null distribution of  $\mathcal{H}^*$  are described next.

## 195 2.5 Simulations

196 We use the same simulation procedure for two purposes. First, we use them to test the power  
197 of CLEAR against other methods in small genomic windows. Second, we use the simulations to  
198 generate the distribution of null values for the statistic to compute empirical  $p$ -values. We mainly  
199 chose parameters that are relevant to *D. melanogaster* experimental evolution [35]. See also [Fig 1-A](#)  
200 for illustration.

201 **I. Creating initial founder line haplotypes.** Using `msms` [21], we created neutral popu-  
202 lations for  $F$  founding haplotypes with command `$. /msms <F> 1 -t <2μWNe> -r <2rNeW>`  
203 `<W>`, where  $F = 200$  is number of founder lines,  $N_o = 10^6$  is effective founder population size,  
204  $r = 2 \times 10^{-8}$  is recombination rate,  $\mu = 2 \times 10^{-9}$  is mutation rate. The window size  $W$  is  
205 used to compute  $\theta = 2\mu N_o W$  and  $\rho = 2N_o r W$ . We chose  $W = 50\text{Kbp}$  for simulating indi-  
206 vidual windows for performance evaluations, and  $W = 20\text{Mbp}$  for simulating *D. melanogaster*  
207 chromosomes for  $p$ -value computations.



208 **II. Creating initial diploid population.** An initial set of  $F = 200$  haplotypes was created  
209 from step I, and duplicated to create  $F$  homozygous diploid individuals to simulate generation  
210 of inbred lines.  $N$  diploid individuals were generated by sampling with replacement from the  
211  $F$  individuals.

212 **III. Forward Simulation.** We used forward simulations for evolving populations under selection.  
213 We also consider selection regimes which the favored allele is chosen from standing variation  
214 (not *de novo* mutations). Given initial diploid population, position of the site under selection,  
215 selection strength  $s$ , number of replicates  $R = 3$ , recombination rate  $r = 2 \times 10^{-8}$  and  
216 sampling times  $\mathcal{T} = \{0, 10, 20, 30, 40, 50\}$ , `simuPop` [48] was used to perform forward simulation  
217 and compute allele frequencies for all of the  $R$  replicates. For hard sweep (respectively, soft  
218 sweep) simulations we randomly chose a site with initial frequency of  $\nu_0 = 0.005$  (respectively,  
219  $\nu_0 = 0.1$ ) to be the favored allele. For generating the null distribution with drift for  $p$ -value  
220 computations, we used this procedure with  $s = 0$ .

221 **IV. Sequencing Simulation.** Given allele frequency trajectories we sampled depth of each site  
222 in each replicate identically and independently from  $\text{Poisson}(\lambda)$ , where  $\lambda \in \{30, 100, 300\}$  is  
223 the coverage for the experiment. Once depth  $d$  is drawn for the site with frequency  $\nu$ , the  
224 number of reads  $c$  carrying the derived allele are sampled according to  $\text{Binomial}(d, \nu)$ . For  
225 experiments with finite depth the tuple  $\langle c, d \rangle$  is the input data for each site.

## 226 3 Results

227 **Modeling Allele Frequency Trajectories in Small Populations.** We first tested the goodness  
228 of fit of the discrete versus continuous models in modeling allele frequency trajectories, under  
229 general E&R parameters. For this purpose, we conducted 100K simulations with two time samples  
230  $\mathcal{T} = \{0, \tau\}$  where  $\tau \in \{1, 10, 100\}$  is the parameter controlling the density of sampling in time. In  
231 addition, we repeated simulations for different values of starting frequency  $\nu_0 \in \{0.005, 0.1\}$  (i.e.,  
232 hard and soft sweep) and selection strength  $s \in \{0, 0.1\}$  (i.e., neutral and selection). Then, given  
233 initial frequency  $\nu_0$ , we computed the expected distribution of the frequency of the next sample  
234  $\nu_\tau$  under two models to make a comparison. Fig 2A-F shows that Brownian motion (continuous  
235 model) is inadequate when  $\nu_0$  is far from 0.5, or when sampling times are sparse ( $\tau > 1$ ). If the  
236 favored allele arises from standing variation in a neutral population, it is unlikely to have frequency  
237 close to 0.5, and the starting frequencies are usually much smaller (see Fig S2). Moreover, in typical  
238 *D. melanogaster* experiments for example, sampling is sparse. Often, the experiment is designed  
239 so that  $10 \leq \tau \leq 100$  [26, 35, 46, 71].

240 In contrast to the Brownian motion approximation, discrete Markov chain predictions (Eq. 11)  
241 are highly consistent with empirical data for a wide range of simulation parameters (Fig 2A-M).  
242 Moreover, the discrete markov chain can be modified to model the case when the the allele is under  
243 selection.

244 **Detection Power.** We compared the performance of CLEAR against other methods for detect-  
245 ing selection. For each method we calculated detection power as the percentage of true-positives  
246 identified with false-positive rate  $\leq 0.05$ . For each configuration (specified with values for selection  
247 coefficient  $s$ , starting allele frequency  $\nu_0$  and coverage  $\lambda$ ), power of each method is evaluated over  
248 2000 distinct simulations, half of which modeled neutral evolution and the rest modeled positive  
249 selection.

250 We compared the power of CLEAR with Gaussian process (GP) [60], FIT [23], and CMH [1]  
251 statistics. FIT and GP convert read counts to allele frequencies prior to computing the test statistic.

252 CLEAR shows the highest power in all cases and the power stays relatively high even for low coverage  
253 (Fig 3 and Table S1). In particular, the difference in performance of CLEAR with other methods  
254 is pronounced when starting frequency is low. The advantage of CLEAR stems from the fact that  
255 favored allele with low starting frequency might be missed by low coverage sequencing. In this  
256 case, incorporating the signal from linked sites becomes increasingly important. We note that  
257 methods using only two time points, such as CMH, do relatively well for high selection values and  
258 high coverage. However, the use of time-series data can increase detection power in low coverage  
259 experiments or when starting frequency is low. Moreover, time-series data provide means for  
260 estimating selection parameters  $s, h$  (see below). Finally, as CLEAR is robust to change of coverage,  
261 our results (Fig 3B,C) suggest that taking many samples with lower coverage is preferable to sparse  
262 sampling with higher coverage.

263 **Site-identification.** In general, localizing the favored variant, using pool-seq data is a nontrivial  
264 task due to extensive linkage disequilibrium [61]. To measure performance, we sorted variants by  
265 their  $H$  scores and computed rank of the favored allele for each method. For each setting of  $\nu_0$   
266 and  $s$ , we conducted 1000 simulations and computed the rank of the favored mutation in each  
267 simulation. The cumulative distribution of the rank of the favored allele in 1000 simulation for  
268 each setting (Fig 5) shows that CLEAR outperforms other statistics.

269 An interesting observation is revisiting the contrast between site-identification and detection [39,  
270 61]. When selection strength is high, detection is easier (Fig 3A-F), but site-identification is harder,  
271 due to the high LD between flanking variants and the favored allele (Fig 5A-F). Moreover, site-  
272 identification becomes more difficult whenever the initial frequency of the favored allele is low, i.e.,  
273 at the onset of selection, LD between favored allele and its nearby variants is high. For example,  
274 when coverage  $\lambda = 100$  and selection coefficient  $s = 0.1$ , the detection power is 75% for hard sweep,  
275 but 100% for soft sweep (Fig 3B-E). In contrast, the favored site was ranked as the top in 14% of  
276 hard sweep cases, compared to and 95% of soft sweep simulations.

277 **Estimating Parameters.** CLEAR estimates effective population size  $\hat{N}$  and selection parameters,  
278  $\hat{s}$  and  $\hat{h}$ , as a byproduct of the hypothesis testing. We computed bias of selection fitness ( $s - \hat{s}$ )  
279 and dominance ( $h - \hat{h}$ ) for of CLEAR and GP for 1000 simulations in each setting. The distribution  
280 of the error (bias) for  $100\times$  coverage is presented in Fig 6 for different configurations. Fig S4 and  
281 Fig S5 provide the distribution of estimation errors for  $30\times$ , and  $300\times$  coverage, respectively. For  
282 hard sweep, CLEAR provides estimates of  $s$  with lower variance of bias (Fig 6A). In soft sweep, GP  
283 and CLEAR both provide unbiased estimates of  $s$  with low variance (Fig 6B). Fig 6 C-D shows that  
284 CLEAR provides unbiased estimates of  $h$  as well when  $h \in \{0, 0.5, 1, 2\}$  and  $s = 0.1$ . We also tested  
285 if CLEAR provide unbiased estimates of  $N$ , by estimating population size on 1000 simulations when  
286  $N \in \{200, 600, 1000\}$ . As shown in Fig 7A-C, maximum likelihood is attained at true value of the  
287 parameter.

288 **Running Time.** As CLEAR does not compute exact likelihood of a region (i.e., does not explicitly  
289 model linkage between sites), the complexity of scanning a genome is linear in number of polymor-  
290 phisms. Calculating score of each variant requires and  $\mathcal{O}(TRN^3)$  computation for  $\mathcal{H}$ . However,  
291 most of the operations are can be vectorized for all replicates to make the effective running time  
292 for each variant. We conducted 1000 simulations and measured running times for computing site  
293 statistics  $H$ , FIT, CMH and GP with different number of linked-loci. Our analysis reveals (Fig 4)  
294 that CLEAR is orders of magnitude faster than GP, and comparable to FIT. While slower than  
295 CMH on the time per variant, the actual running times are comparable after vectorization and  
296 broadcasting over variants (see below).



297 These times can have a practical consequence. For instance, to run GP in the single locus  
298 mode on the entire pool-seq data of the *D. melanogaster* genome from a small sample ( $\approx 1.6\text{M}$   
299 variant sites), it would take 1444 CPU-hours ( $\approx 1$  CPU-month). In contrast, after vectorizing and  
300 broadcasting operations for all variants operations using `numba` package, CLEAR took 75 minutes  
301 to perform an scan, including precomputation, while the fastest method, CMH, took 17 minutes.

### 302 3.1 Analysis of a *D. melanogaster* Adaptation to Alternating Temperatures

303 We applied CLEAR to the data from a study of *D. melanogaster* adaptation to alternating temper-  
304 atures [26, 46], where 3 replicate samples were chosen from a population of *D. melanogaster* for  
305 59 generations under alternating 12-hour cycles of hot stressful ( $28^\circ\text{C}$ ) and non-stressful ( $18^\circ\text{C}$ )  
306 temperatures and sequenced. In this dataset, sequencing coverage is different across replicates and  
307 generations (see S2 Fig of [60]) which makes variant depths highly heterogeneous (Fig S8).

308 We first filtered out heterochromatic, centromeric and telomeric regions [25], and those variants  
309 that have collective coverage of more than 1500 in all 13 populations: three replicates at the  
310 base population, two replicates at generation 15, one replicate at generation 23, one replicate at  
311 generation 27, three replicates at generation 37 and three replicates at generation 59. After filtering,  
312 we ended up with 1,605,714 variants.

313 Next, we estimated genome-wide population size  $\hat{N} = 250$  (Fig 7-E) which is consistent with  
314 previous studies [33, 46]. The likelihood curves of CLEAR are sharper around the optimum compared  
315 to that of Bollback et. al [11]’s method (see Supplementary Fig. 1 in [46]). Also, chromosomes 3L  
316 and 3R appear to have smaller population size Fig 7-D,  $\hat{N} = 200, 150$ , respectively. Others have  
317 made similar observations on this data. In particular, Jónás *et al.* [33] shown that the chromosome-  
318 wise population size varies even more when it is computed for each replicate separately (see Table  
319 1 in [33]). For instance,  $\hat{N}$  is 131 for chromosome 3R replicate 1, while it is 328 for chromosome X  
320 replicate 2.

321 While it would be ideal to compute CLEAR statistic for each replicate and chromosome sepa-  
322 rately, computing empirical  $p$ -values and significant regions become computationally intensive as  
323 empirical null distribution of each replicate and each chromosome needs to be computed. Hence, we  
324 use a single genome-wide estimate  $\hat{N} = 250$  in all analyses, but we normalize statistic  $\mathcal{H}^*$  separately  
325 for each chromosome.

326 We use a heuristic calculation (See S1 Text) to choose the sliding window size  $L$  as the dis-  
327 tance where the LD between the favored mutation and a site  $L/2\text{bp}$  away remains strong. For *D.*  
328 *melanogaster* parameters, we obtained  $L = 30\text{kbp}$ . We computed the normalized test statistic  $\mathcal{H}^*$   
329 on sliding windows of size of 30Kbp and step size of 5Kbp over the genome (See Fig 8-A).

330 Empirical null distribution of  $\mathcal{H}^*$  was estimated by creating 100 whole genome simulations  
331 (400K statistic values) as described in Section 2.5. Then,  $p$ -value of the test statistic in each  
332 region in the experimental data was calculated as the fraction of the null statistic values that are  
333 greater than or equal to the test statistic(see Fig S9). After correcting for multiple testing, we  
334 identified 5 contiguous intervals (Fig 8) satisfying  $\text{FDR} \leq 0.05$ , and covering 2,829 polymorphic  
335 sites. We further performed single-locus hypothesis testing on the 2,829 sites to identify 174  
336 individual variants with  $\text{FDR} \leq 0.01$  (Fig 8-B).

337 The final set of 174 variants fall within 32 genes (Table S3) including many Serine inhibitory  
338 proteases (serpins), and other genes involved in endocytosis. Recycling of synaptic vesicles is seen  
339 to be blocked at high temperature in temperature sensitive *Drosophila* mutants [36]. This is also  
340 supported by GO enrichment analysis, where a single GO term ‘inhibition of proteolysis’ is found  
341 to enriched (corrected  $p$ -value:0.0041). To test for dominant selection, we computed  $D$  statistic on  
342 simulated neutral and experimental data, and computed  $p$ -values accordingly. After correcting for

343 multiple testing, 96 variants were discovered with  $FDR \leq 0.01$  (Fig S10).

### 344 3.2 Analysis of Outcrossing Yeast Populations

345 We also applied CLEAR to 12 replicate samples of outcrossing yeast populations [14], where sam-  
346 ples are taken at generations  $\mathcal{T} = \{0, 180, 360, 540\}$ . We observed a significant variation in the  
347 genome-wide site frequency spectrum of certain populations over different time points for some  
348 replicates (Fig S11). The variation does not have an easily identifiable cause. Therefore, we focused  
349 analysis on seven replicates  $r \in \{3, 7, 8, 9, 10, 11, 12\}$  with genome-wide site-frequency spectrum over  
350 the time range (Fig S12).

351 We estimated population size to be  $\hat{N} = 2000$  haplotypes, and computed  $\hat{s}$ ,  $\hat{h}$  and  $H$  statistic  
352 accordingly. To compute  $p$ -values, we created 1M single-locus neutral simulations according to  
353 experimental data's initial frequency and coverage. By setting FDR cutoff to 0.05, only 18 and  
354 16 variants show significant signal for directional and dominant selection, respectively (Fig S10).  
355 Selected variants for directional selection are clustered in two regions, which match 2 of the 5 regions  
356 (regions C and E in Fig. 2-a in [14]) identified by Burke *et al.* in their preliminary analysis.

## 357 4 Discussion

358 We developed a computational tool, CLEAR, that can detect regions and variants under selection  
359 E&R experiments. Using extensive simulations, we show that CLEAR outperforms existing methods  
360 in detecting selection, locating the favored allele, and estimating model parameters. Also, while be-  
361 ing computationally efficient, CLEAR provide means for estimating populations size and hypothesis  
362 testing.

363 Many factors such as small population size, finite coverage, linkage disequilibrium, finite sam-  
364 pling for sequencing, duration of the experiment and the small number of replicates can limit the  
365 power of tools for analyzing E&R. Here, by an discrete modeling, CLEAR estimates population size,  
366 and provides unbiased estimates of  $s, h$ . It adjusts for heterogeneous coverage of pool-seq data, and  
367 exploits presence of linkage within a region to compute composite likelihood ratio statistic.

368 It should be noted that, even though we described CLEAR for small fixed-size populations,  
369 the statistic can be adjusted for other scenarios, including changing population sizes when the  
370 demography is known. For large populations, transitions can be computed on sparse data structures,  
371 as for large  $N$  the transition matrices become increasingly sparse. Alternatively, frequencies can  
372 be binned to reduce dimensionality.

373 The comparison of hard and soft sweep scenarios showed that initial frequency of the favored  
374 allele can have a nontrivial effect on the statistical power for identifying selection. Interestingly,  
375 while it is easier to detect a region undergoing strong selection, it is harder to locate the favored  
376 allele in that region.

377 There are many directions to improve the analyses presented here. In particular, we plan to  
378 focus our attention on other organisms with more complex life cycles, experiments with variable  
379 population size and longer sampling-time-spans. As evolve and resequencing experiments continue  
380 to grow, deeper insights into adaptation will go hand in hand with improved computational analysis.

381 **Software and Data Availability.** The source code and running scripts for CLEAR are publicly  
382 available at <https://github.com/airanmehr/clear>.

383 *D. melanogaster* data originally published [26, 46]. The dataset of the *D. melanogaster* study,  
384 until generation 37, is obtained from Dryad digital repository (<http://datadryad.org>) under  
385 accession DOI: 10.5061/dryad.60k68. Generation 59 of the *D. melanogaster* study is accessed

386 from European Sequence Read Archive (<http://www.ebi.ac.uk/ena/>) under the project accession  
387 number: PRJEB6340. The dataset containing experimental evolution of Yeast populations [14]  
388 is downloaded from <http://wfitcch.bio.uci.edu/~tdlong/PapersRawData/BurkeYeast.gz> (last  
389 accessed 01/24/2017). UCSC browser tracks for *D. melanogaster* and Yeast data analysis are found  
390 in Suppl. Data 1 and 2, respectively.

## 391 **Acknowledgments**

392 AI, AA, and VB were supported by grants from the NIH (1R01GM114362) and NSF (DBI-1458557  
393 and IIS-1318386). CS is supported by the European Research Council grant ArchAdapt.

## 394 **Conflict of interest**

395 VB is a co-founder, has an equity interest, and receives income from Digital Proteomics, LLC (DP).  
396 The terms of this arrangement have been reviewed and approved by the University of California,  
397 San Diego in accordance with its conflict of interest policies. DP was not involved in the research  
398 presented here.

399 **Figures**

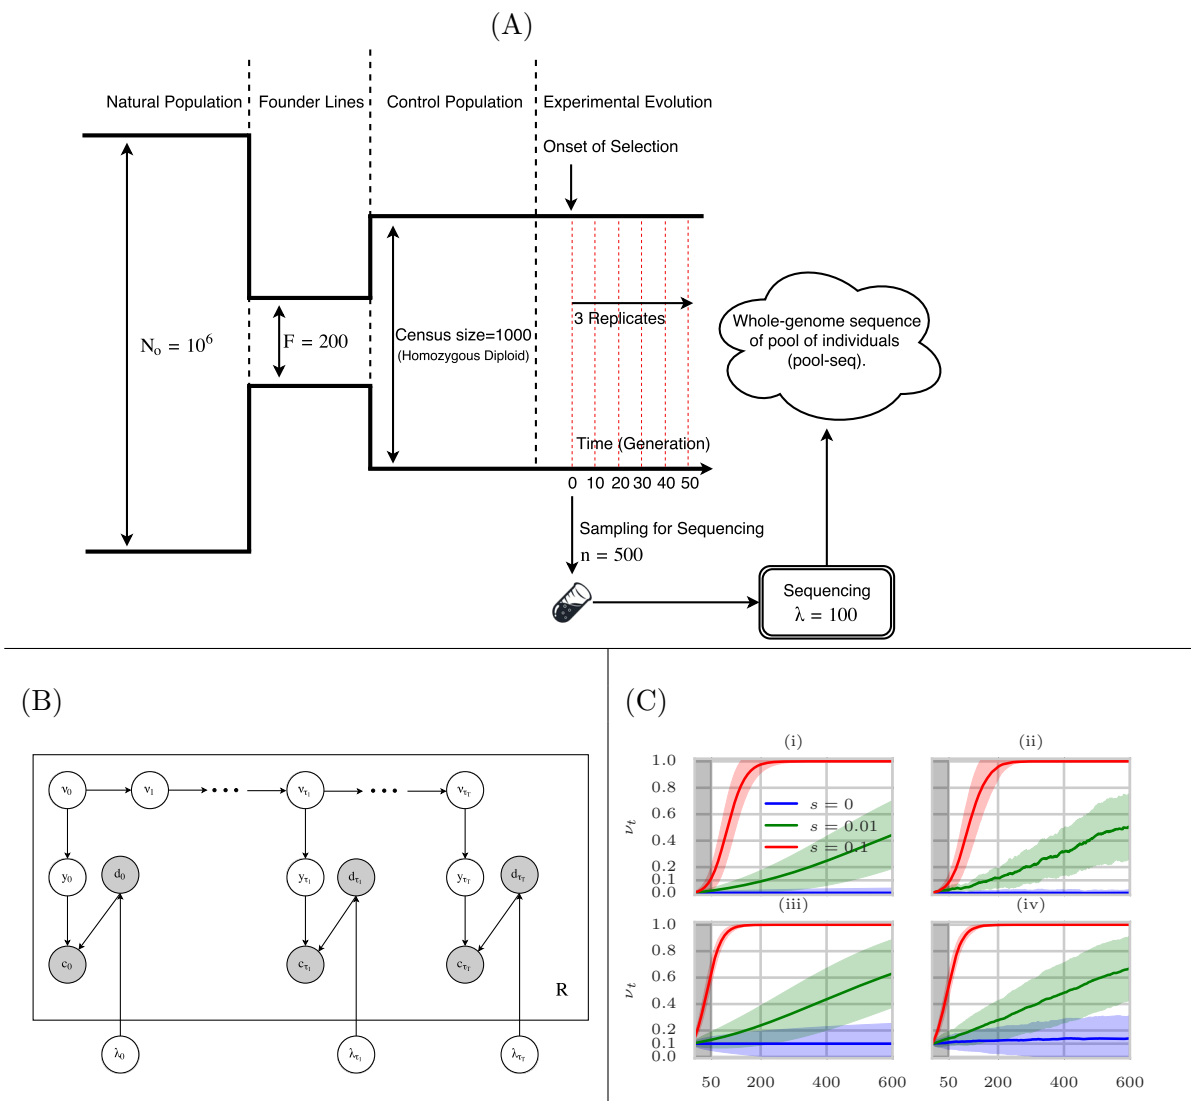

**Fig 1: Evolve and Resequence Selection Experiments on *D. melanogaster*.** (A) Typical configuration in which time-series data is collected for *D. melanogaster*. A small set of founder lines ( $F = 200$ ) is selected from a large population ( $N_o = 10^6$ ), and used to create a sub-population of isofemale lines. Multiple replicates of the population are evolved and resequenced to collect time-series genomic data. For sequencing,  $n$  individuals are randomly sampled and sequenced with coverage  $\lambda$ . (B) Graphical model showing dependence of the random variables in the single-locus model used to compute CLEAR statistics. Observed variables,  $c$  (derived allele read count) and  $d$  (total read count) are shaded. The variables  $\nu, y, \lambda$  denote allele frequency, sampled allele frequency, and mean sequencing coverage, respectively. (C) Mean and 95% confidence interval of the theoretical (i,iii) and empirical (ii,iv) trajectories of the favored allele for hard (i,ii) and soft (iii,iv) sweep scenarios and  $N = 1000$ . The first 50 generations are shaded in gray to represent the sampling span of sampling in short-term experiments, illustrating the difficulty in predicting selection at early stages of selective sweep.

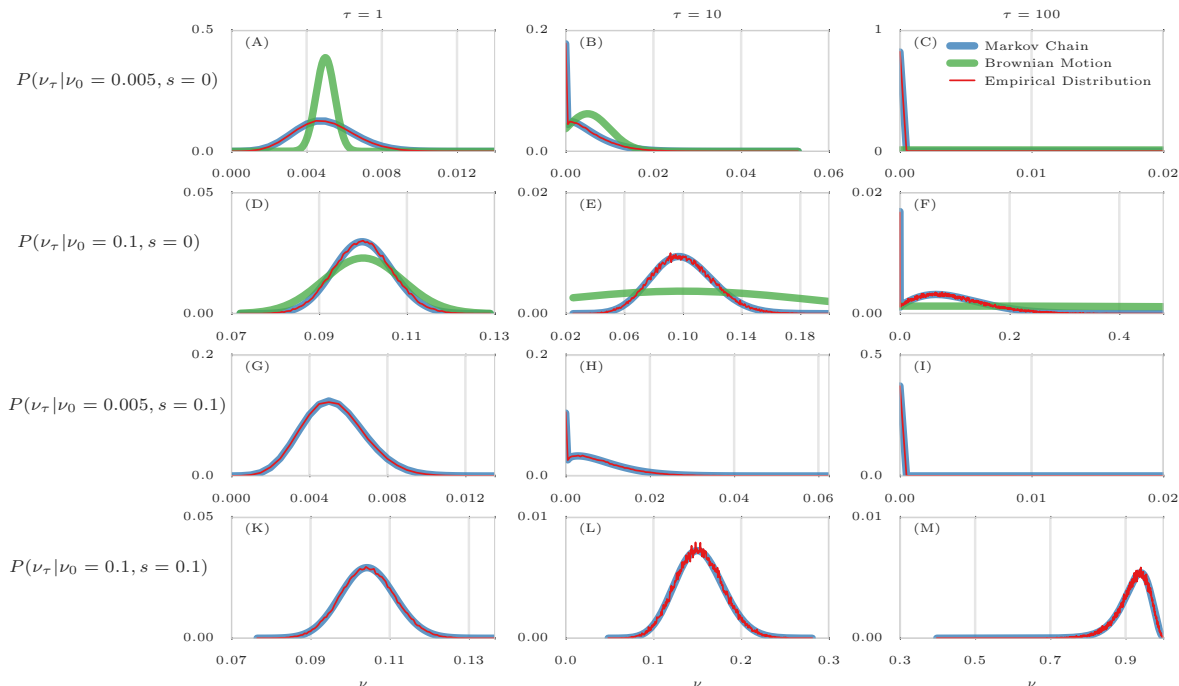

**Fig 2: Comparison of empirical distributions of allele frequencies (red) versus predictions from Brownian Motion (green), and Markov chain (blue).**

Comparison of empirical and theoretical distributions under neutral evolution (panels A-F) and selection (panels G-M) with different starting frequencies  $\nu_0 \in \{0.005, 0.1\}$  and sampling times of  $\mathcal{T} = \{0, \tau\}$ , where  $\tau \in \{1, 10, 100\}$ . For each panel, the empirical distribution was computed over 100,000 simulations. Brownian motion (Gaussian approximation) provides poor approximations when initial frequency is far from 0.5 (A) or sampling is sparse (B,C,E,F). In addition, Brownian motion can only provide approximations under neutral evolution. In contrast, Markov chain consistently provides a good approximation in all cases.

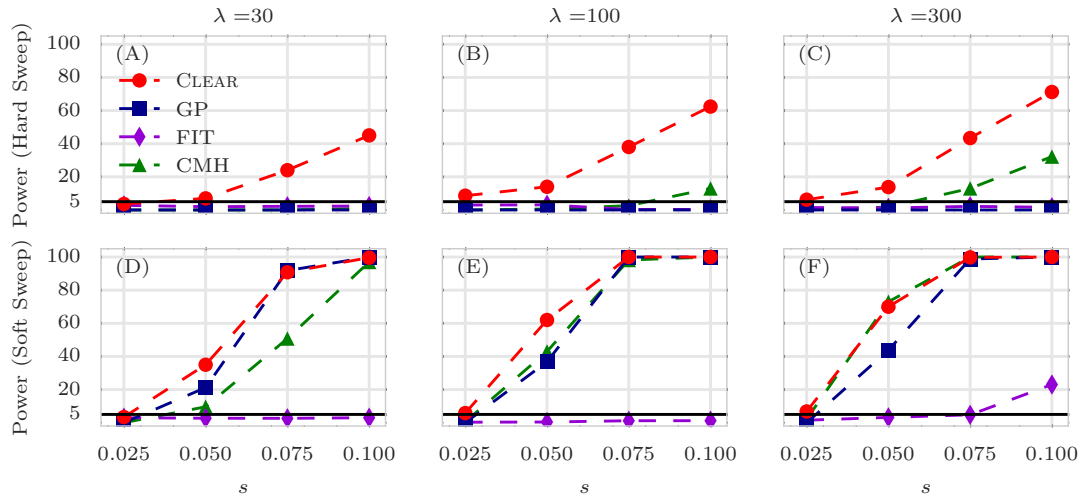

Fig 3: **Power calculations for detection of selection.**

Detection power for CLEAR( $\mathcal{H}$ ), Frequency Increment Test (FIT), Gaussian Process (GP), and CMH under hard (A-C) and soft sweep (D-F) scenarios.  $\lambda$ ,  $s$  denote the mean coverage and selection coefficient, respectively. The  $y$ -axis measures power – sensitivity with false positive rate  $FPR \leq 0.05$  – for 2,000 simulations with  $N = 1,000$ ,  $L = 50\text{Kbp}$ . The horizontal line reflects the power of a random classifier. In all simulations, 3 replicates are evolved and sampled at generations  $\mathcal{T} = \{0, 10, 20, 30, 40, 50\}$ .

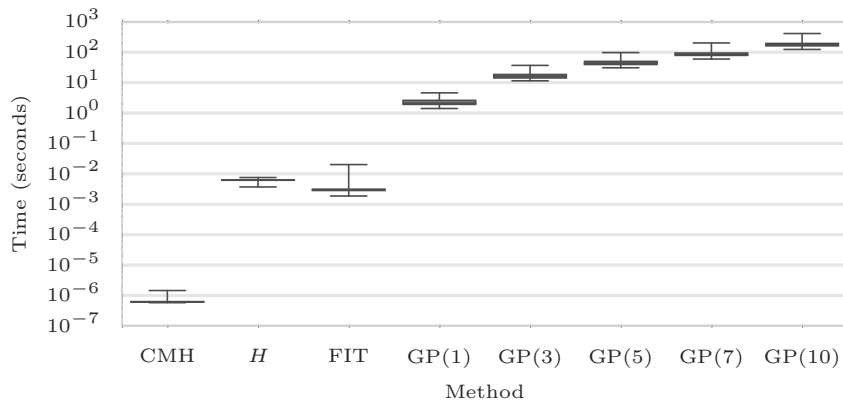

Fig 4: **Running time.**

Box plots of running time per variant (CPU-secs.) of CLEAR( $\mathcal{H}$ ), CMH, FIT, and GP with single, 3, 5, 7, and 10 loci over 1000 simulations conducted on a workstation with Intel Core i7 processor. The average running time for each method is shown on the x-axis. In all simulations, 3 replicates are evolved and sampled at generations  $\mathcal{T} = \{0, 10, 20, 30, 40, 50\}$ .



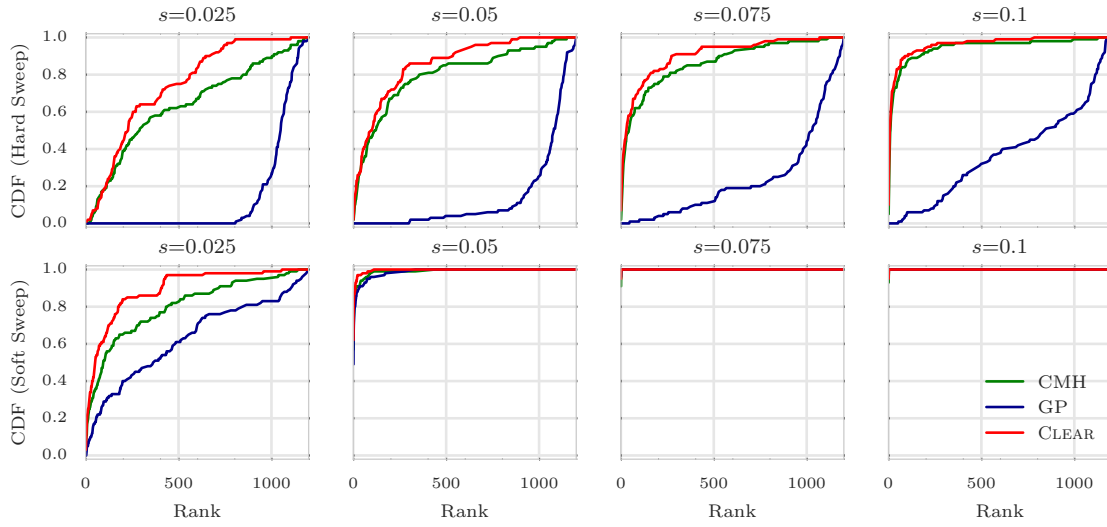

**Fig 5: Ranking performance for 100x coverage.**

Cumulative Distribution Function (CDF) of the distribution of the rank of the favored allele in 1000 simulations for CLEAR ( $H$ ), Gaussian Process (GP), CMH, and Frequency Increment Test (FIT), for different values of selection coefficient  $s$  and initial carrier frequency. Note that the individual variant CLEAR score ( $H$ ) is used to rank variants. The Area Under Curve (AUC) is computed as an overall quantitative measure to compare the performance of methods for each configuration. In all simulations, 3 replicates are evolved and sampled at generations  $\mathcal{T} = \{0, 10, 20, 30, 40, 50\}$ .

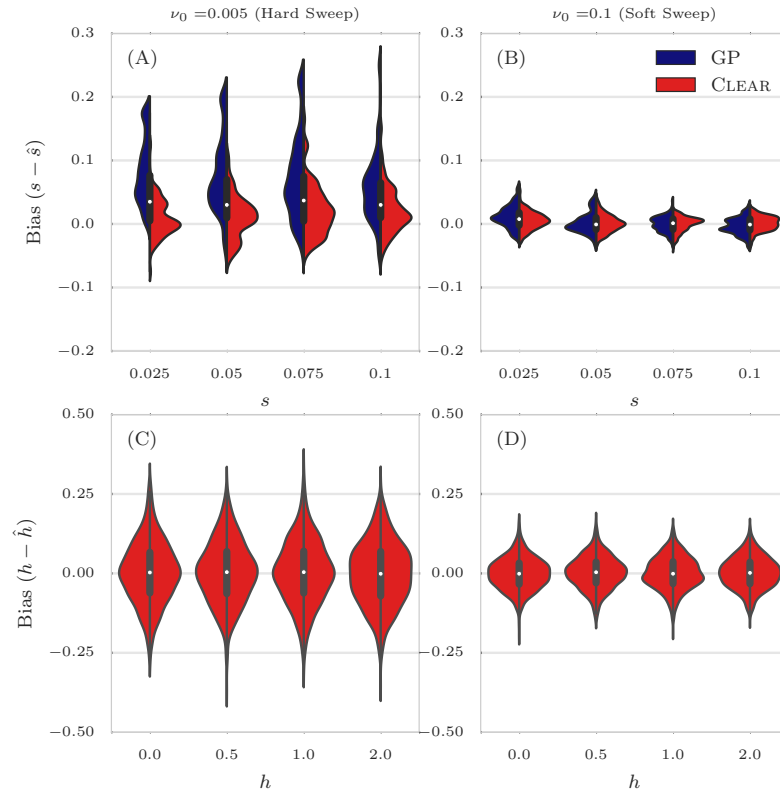

**Fig 6: Distribution of bias for  $100\times$  coverage.**

The distribution of bias ( $s - \hat{s}$ ) in estimating selection coefficient over 1000 simulations using Gaussian Process (GP) and CLEAR ( $H$ ) is shown for a range of choices for the selection coefficient  $s$  and starting carrier frequency  $\nu_0$ , when coverage  $\lambda = 100$  (Panels A,B). GP and CLEAR have similar variance in estimates of  $s$  for soft sweep, while CLEAR provides lower variance in hard sweep. Also see [Table S2](#). Panels C,D show the variance in the estimation of  $h$ . In all simulations, 3 replicates are evolved and sampled at generations  $\mathcal{T} = \{0, 10, 20, 30, 40, 50\}$ .

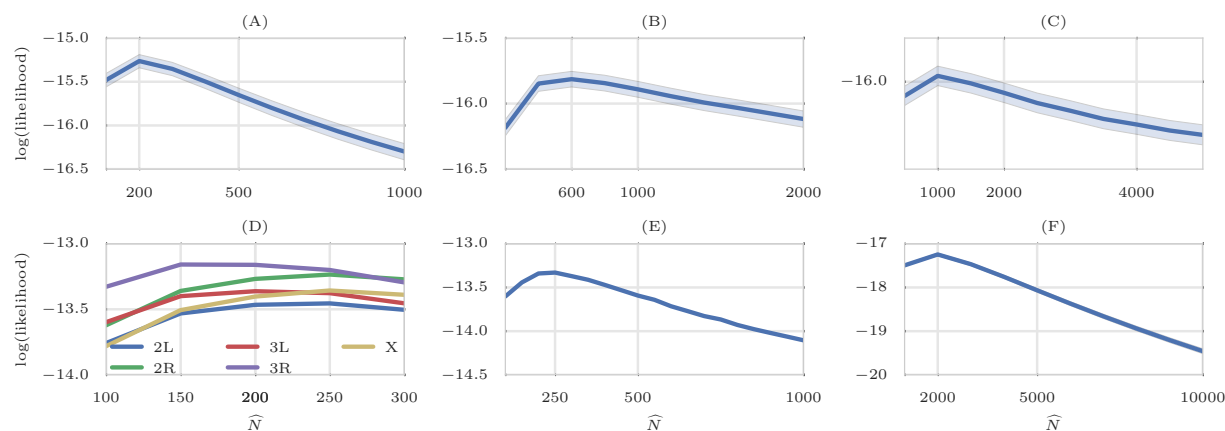

Fig 7: **Maximum likelihood Estimates of  $N$ .** Mean and 95% confidence interval of likelihoods of  $N$  on simulated data with  $N = 200$  (A),  $N = 600$ (B), and  $N = 1000$  individuals, over 1000 simulations. Chromosome-wise (D) and genome-wide (E) likelihood of population size for data from a study of *D. melanogaster* adaptation to alternating temperatures. Likelihood of the Chromosome 3R is attained at 150, while genome-wide maximum likelihood estimate for population size is 250. (F) Likelihood of the population size with respect to all the variants in the yeast dataset. Despite large census population size ( $10^6 - 10^7$  [14]), this dataset exhibits much smaller effective population size ( $\hat{N} = 2000$ ).

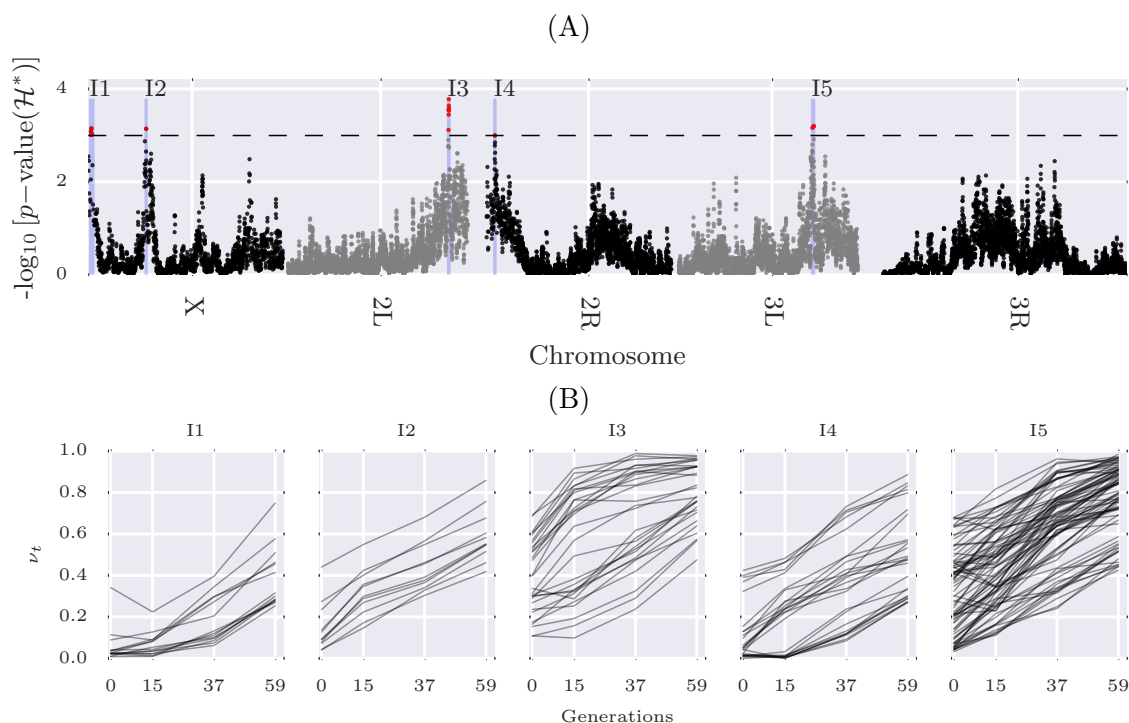

Fig 8: **Scan of CLEAR statistic on data from a study of *D. melanogaster* adaptation to alternating temperatures.** (A) Manhattan plot of scan for  $\mathcal{H}^*$  statistic over the genome. The dashed line represents cutoff for genome-wide FDR  $\leq 0.05$ , and identifies 5 contiguous intervals, I1-I5, which are shaded in blue. (B) Trajectories of the selected variants within intervals I1-I5.

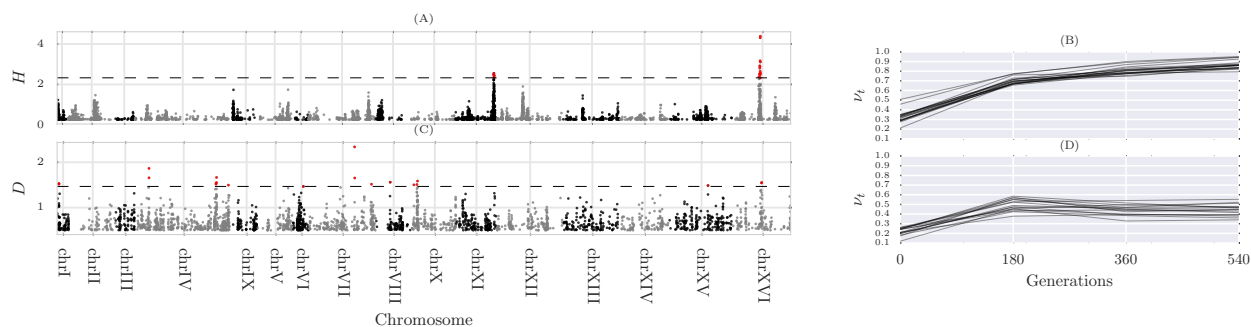

**Fig 9: Single locus analysis of the yeast outcrossing populations.** Manhattan plot of scan for testing directional selection (A) and dominant selection (C). The dashed line represents cutoff for genome-wide  $FDR \leq 0.05$ . Trajectories of the selected variants are depicted in panels (B) and (D).

## 400 S1 Text Choosing Window Size

401 In genome-wide scans for detecting selection, we apply the CLEAR statistic on sliding windows of  
402 length  $L$ bp. The single locus statistic values within the window are averaged to get the composite  
403 statistic. While the statistic is robust to variation in window-size, choosing a very large window  
404 where LD has decayed will weaken the composite signal, and choosing a small window will decrease  
405 the power of composite likelihoods. Here, we use a systematic calculation to choose  $L$  as the  
406 distance where the LD between the favored mutation and a site  $L/2$ bp away remains strong.

407 Consider a segregating site  $l$  bp away from the favored allele in a selective sweep. Let  $\rho_\tau$  be  
408 the LD between the favored allele and the site,  $\tau$  generations after the onset of selection. Then, we  
409 have (see Eqs. 30-31 in [58]):

$$\rho_\tau = \alpha_\tau \beta_\tau \rho_0 = e^{-r\tau l} \left( \frac{K^{(\tau)}}{K^{(0)}} \right) \rho_0, \quad (\text{S1})$$

410 where  $K^{(\tau)} = 2\nu_\tau(1 - \nu_\tau)$  is the heterozygosity at the selected site,  $r$  is the recombination rate  
411 (crossovers/bp/gen). The ‘decay factor’,  $\alpha_\tau = e^{-r\tau l}$ , and ‘growth factor’,  $\beta_\tau$ , are due to recombina-  
412 tion and selection, respectively. Under regular parameter settings, linkage to the favored allele is  
413 expected to increase after onset of selection and then decreases due to crossover events (See Fig S13-  
414 A). While  $\rho_0$  is unknown in pool-seq E&R experiments, we compute the value of  $l$  so that

$$\alpha_\tau \beta_\tau = 1. \quad (\text{S2})$$

415 In E&R scenarios, we let  $\tau$  be the time of the last sampling. For given  $s$ , we aim to compute the  
416 smallest window size  $L$  over all possible starting frequencies. Specifically,

$$L = 2 \min_{\nu_0} \left\{ \frac{1}{r\tau} \log \left( \frac{\hat{\nu}_\tau(1 - \hat{\nu}_\tau)}{\nu_0(1 - \nu_0)} \right) \right\}, \quad (\text{S3})$$

417 where the term  $\hat{\nu}_\tau$  depends on initial frequency  $\nu_0$  and selection strength  $s$  (Eq. 9).

418 We used *D. melanogaster* dataset parameters,  $N = 250$ ,  $r = 2 \times 10^{-8}$  and  $\tau = 59$  to compute  
419 the optimal window size for different values of  $Ns$ , ranging from weak selection to strong selection:  
420  $Ns \in \{20, 100, 200, 500\}$ , or  $s \in \{0.08, 0.4, 0.8, 2\}$ . We set  $L = 30$ Kbp (See Fig S13-B) to provide  
421 good resolution for detecting weak selection.

---

**Generative Process 1:** The Generative Process for Neutral Wright-Fisher Time-series Pool-seq Data.

---

**Input:**  $N, n, R, \{\lambda_t\}_{t \in \mathcal{T}}, \mathcal{T} = \{\tau_0, \dots, \tau_T\}$

**Output:** Time-series pool-seq data for  $R$  replicates of a single locus  $\{\mathbf{c}\}_R$  and  $\{\mathbf{d}\}_R$ .

```

for  $r \leftarrow 1$  to  $R$  do
  for  $t \leftarrow \tau_0$  to  $\tau_T$  do
     $2N\nu_t \sim \text{Binomial}(2N, \nu_{t-1});$ 
    if  $t \in \mathcal{T}$  then
       $d_t^{(r)} \sim \text{Poisson}(\lambda_{\tau_t});$ 
       $2ny_t \sim \text{Binomial}(2n, \nu_t);$ 
       $c_t^{(r)} \sim \text{Binomial}(d_t^{(r)}, y_t);$ 
    end
  end
end

```

---

Fig S1: The Generative Process for Neutral Wright-Fisher Time-series Pool-seq Data.

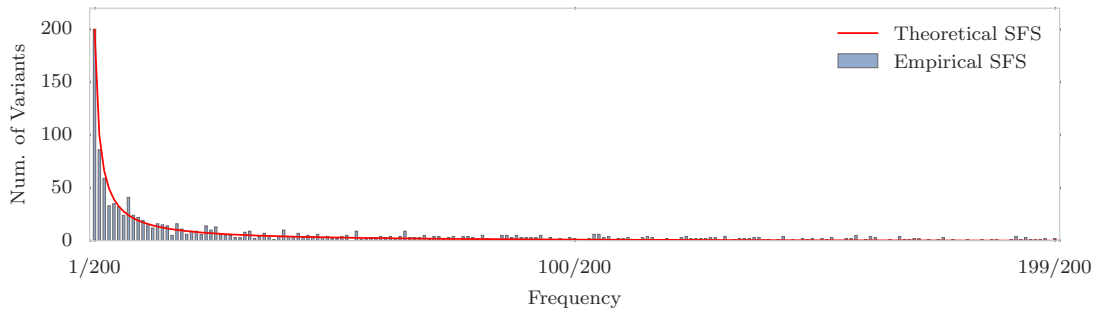

Fig S2: Site Frequency Spectrum.

Theoretical and Empirical SFS in a 50Kbp region for a neutral population of 200 individuals when  $N_e = 10^6$  and  $\mu = 10^{-9}$ . The  $x$ -axis corresponds to site frequency, and the  $y$ -axis to the number of variants with a specific frequency. In a neutral population, majority of the variations stand in low frequency.

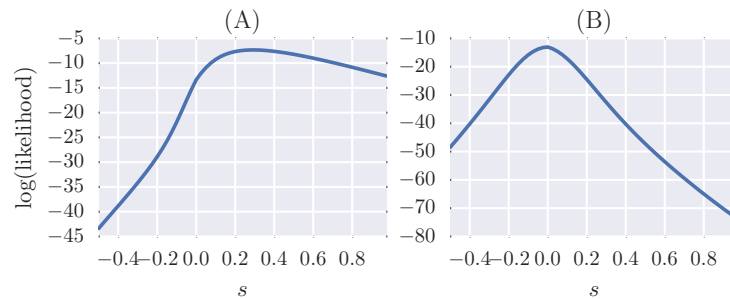

Fig S3: Likelihoods of the parameter  $s$ .

Likelihood of the parameter  $s$  in *D. melanogaster* data for a variant with  $\hat{s} = 0.2$  (A) and  $\hat{s} = 0$  (B).



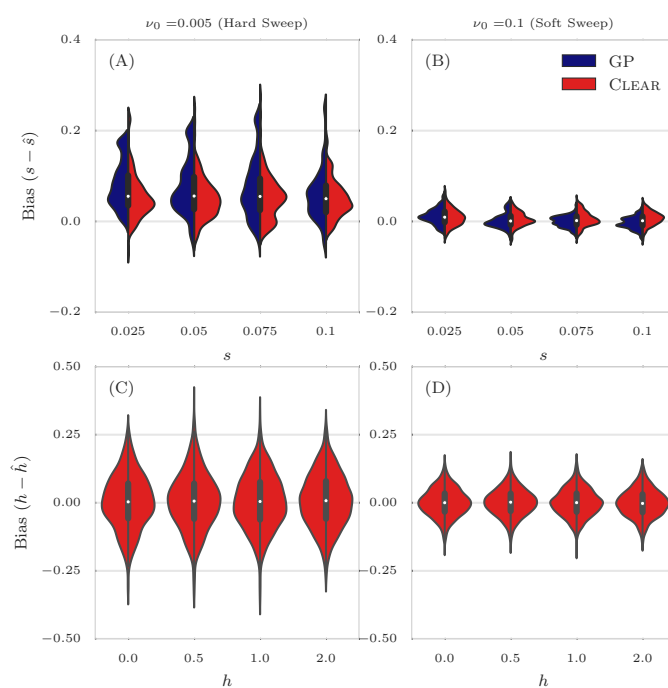

Fig S4: **Distribution of bias for  $30\times$  coverage.**

The distribution of bias ( $s - \hat{s}$ ) in estimating selection coefficient over 1000 simulations using Gaussian Process (GP) and CLEAR ( $H$ ) is shown for a range of choices for the selection coefficient  $s$  and starting carrier frequency  $\nu_0$ , when coverage  $\lambda = 30$  (Panels A,B). GP and CLEAR have similar variance in estimates of  $s$  for soft sweep, while CLEAR provides lower variance in hard sweep. Also see Table S2. Panels C,D show the variance in the estimation of  $h$ .

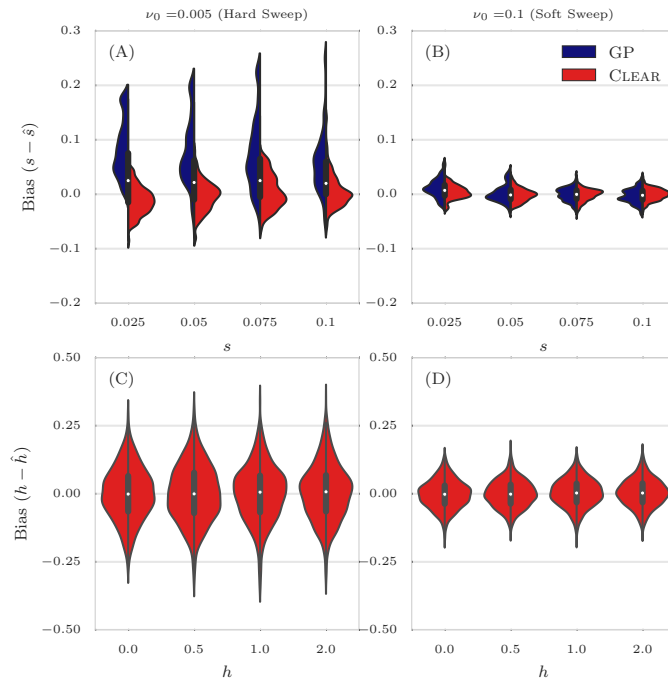

Fig S5: **Distribution of bias for 300 $\times$  coverage.**

The distribution of bias ( $s - \hat{s}$ ) in estimating selection coefficient over 1000 simulations using Gaussian Process (GP) and CLEAR ( $H$ ) is shown for a range of choices for the selection coefficient  $s$  and starting carrier frequency  $\nu_0$ , when coverage  $\lambda = \infty$  (Panels A,B). GP and CLEAR have similar variance in estimates of  $s$  for soft sweep, while CLEAR provides lower variance in hard sweep. Also see Table S2. Panels C,D show the variance in the estimation of  $h$ .

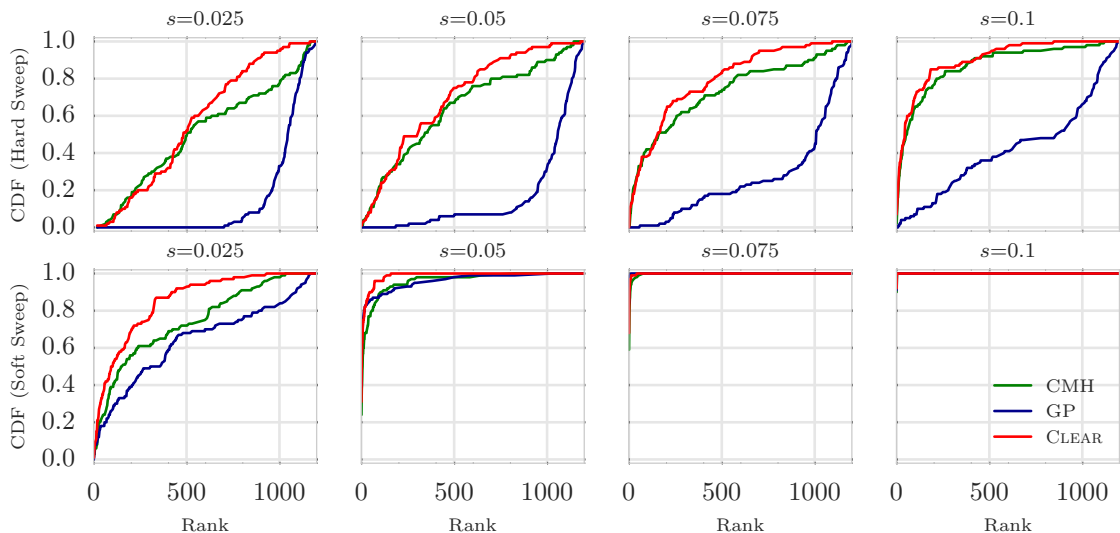

**Fig S6: Ranking performance for  $30\times$  coverage.**

Cumulative Distribution Function (CDF) of the distribution of the rank of the favored allele in 1000 simulations for CLEAR ( $H$  score), Gaussian Process (GP), and Cochran Mantel Haenszel (CMH), for different values of selection coefficient  $s$  and initial carrier frequency.

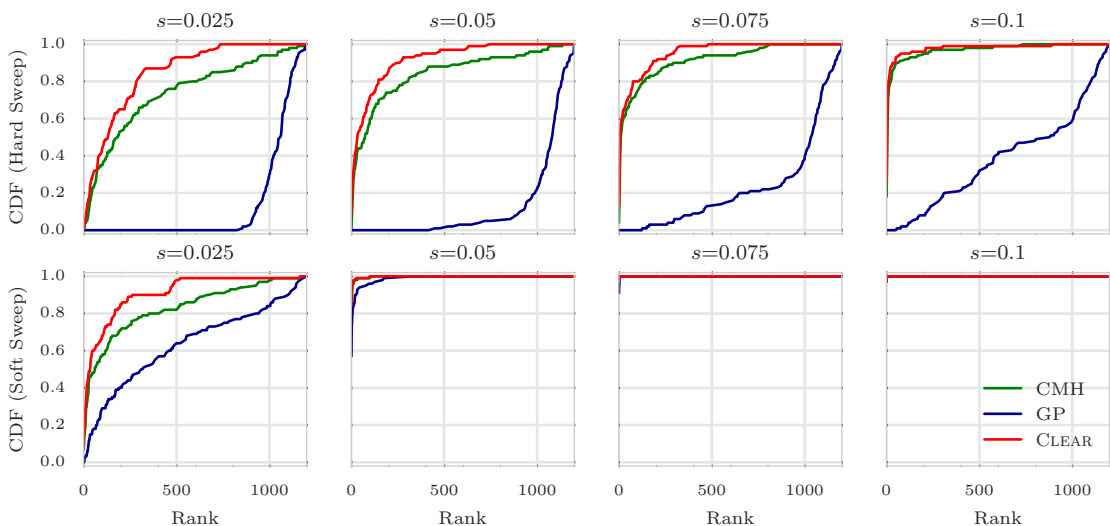

**Fig S7: Ranking performance for  $300\times$  coverage.**

Cumulative Distribution Function (CDF) of the distribution of the rank of the favored allele in 1000 simulations for CLEAR ( $H$  score), Gaussian Process (GP), and Cochran Mantel Haenszel (CMH), for different values of selection coefficient  $s$  and initial carrier frequency.

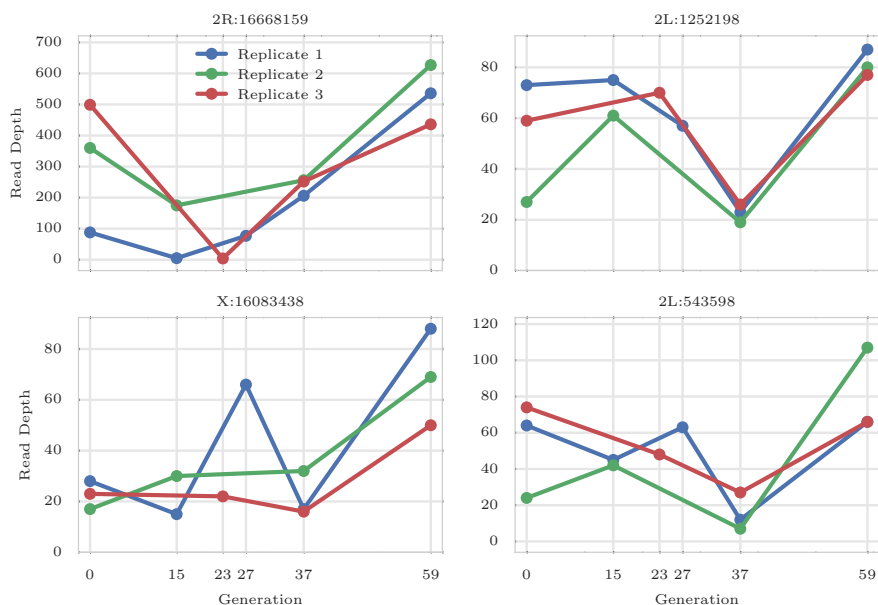

Fig S8: **Coverage heterogeneity in time series data.**

Each panel shows the read depth for 3 replicates of the data from a study of *D. melanogaster* adaptation to alternating temperatures data (see section 3.1). Heterogeneity in depth of coverage is seen between replicates, and also at different time points, in all 4 variants. None of these sites pass the the hard filtering with minimum depth of 30.

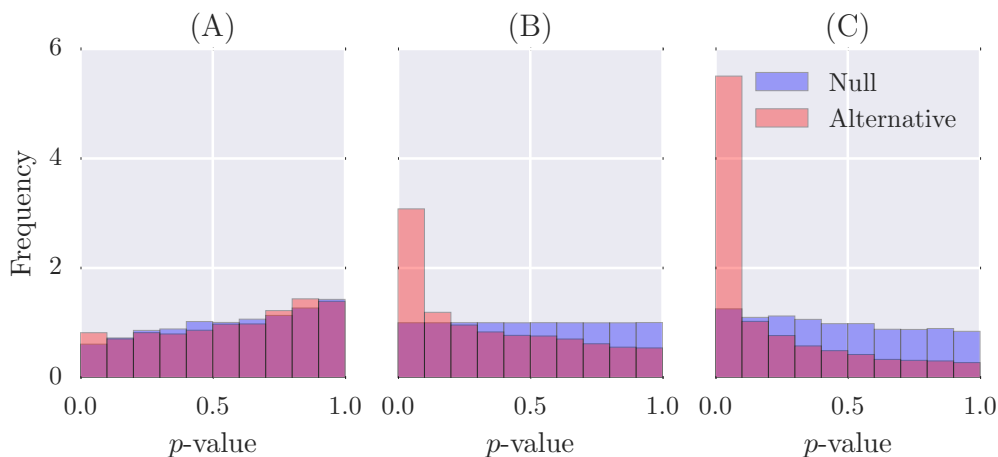

Fig S9: **Distribution of  $p$ -values.** Distribution of  $p$ -values of CLEAR in null simulations and experimental data when  $N = 250$ . Panel (A),(C) shows the effect of under estimations ( $\hat{N} = 100$ ) and over-estimation ( $\hat{N} = 500$ ) of population size in computing  $p$ -values, and panel (B) shows the distribution of  $p$ -values when unbiased estimate is used to create simulations. .

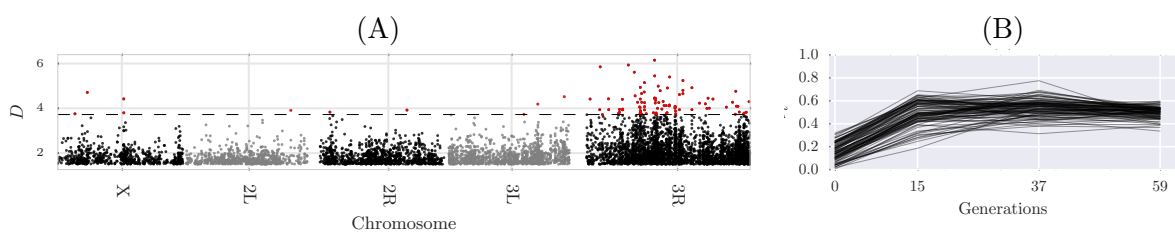

**Fig S10: Single locus analysis of the data from a study of *D. melanogaster* adaptation to alternating temperatures.**

Manhattan plot of scan for testing dominant selection (A). Significant variants with  $FDR \leq 0.01$  are denoted in red, and their trajectories are depicted in panel (B).

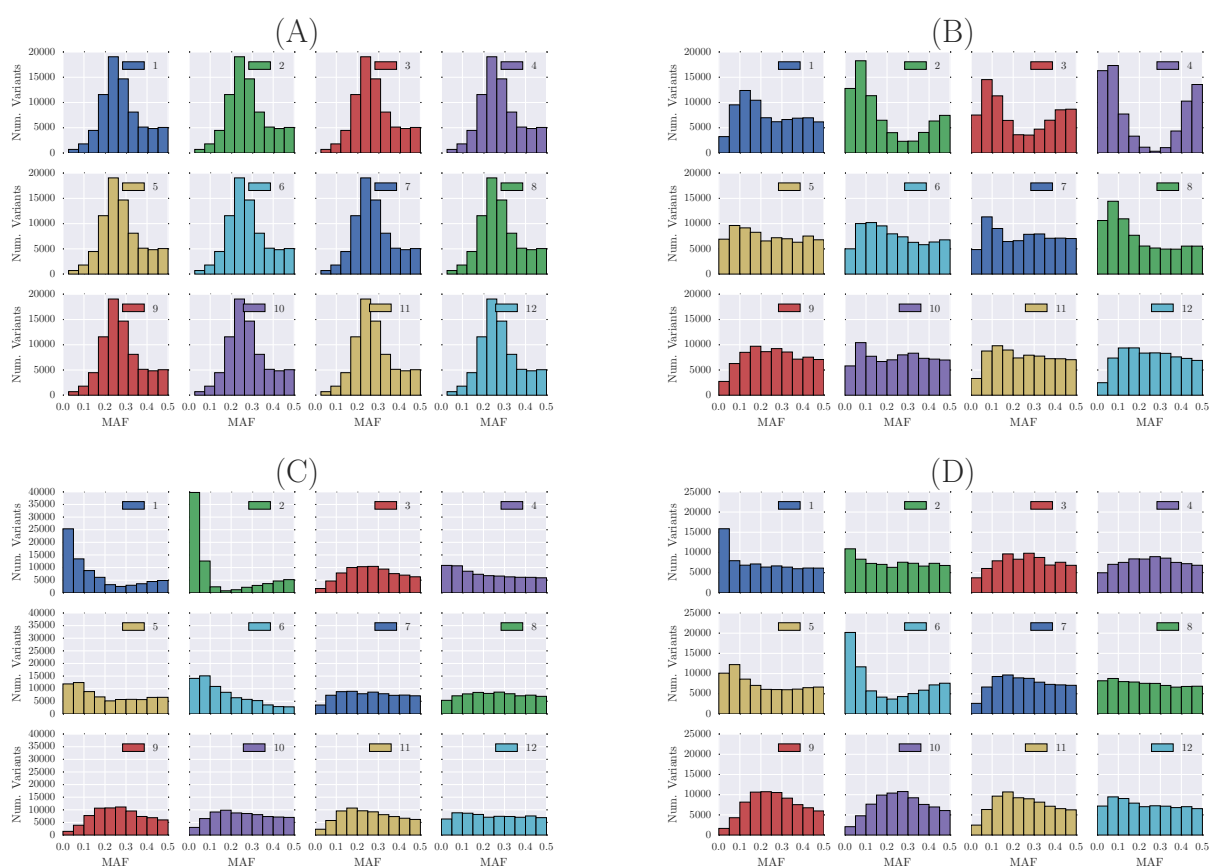

**Fig S11: Site frequency spectrum of the Yeast dataset.** Whole-genome site frequency spectrum of the Yeast dataset at generations 0 (A), 180 (B), 360 (C) and 540 (D). Some replicates, e.g. replicate 2, undergoing severe demographic events.

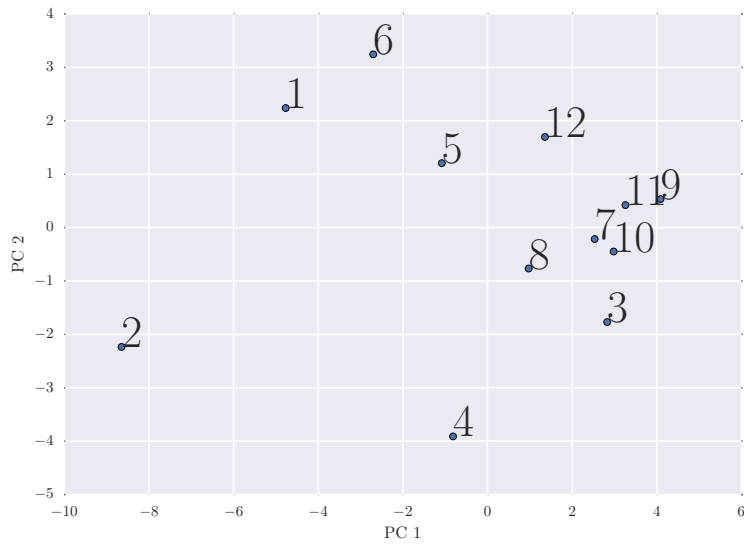

Fig S12: **Population similarity.** Principle component analysis of the 12 replicates throughout the experiment, showing that some populations exhibiting distinct frequency spectra.

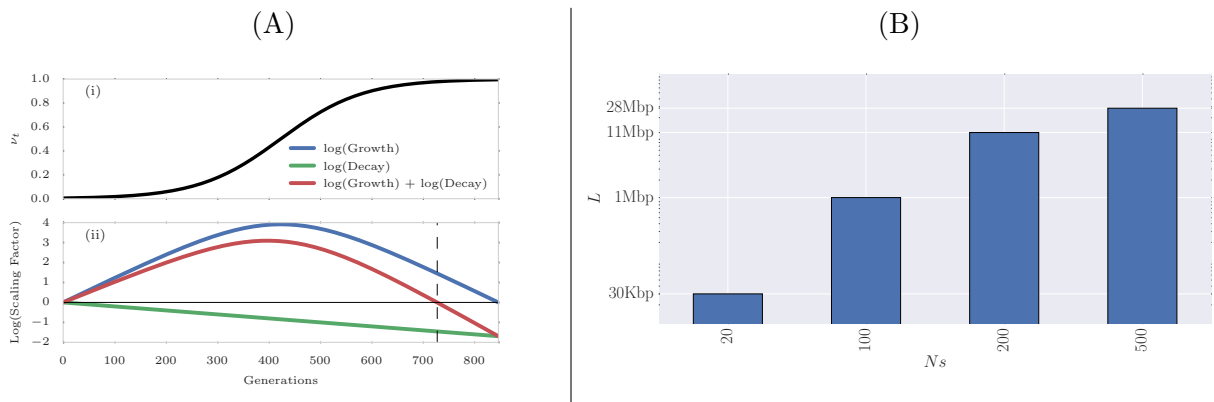

Fig S13: **Choosing window size for CLEAR statistic.** (A) Expected dynamics of LD between favored allele ( $s = 0.025$ ) and a variant 50Kbp away, with initial frequency  $\nu_0 = 0.01$ . (A-i) depicts the dynamic of the favored allele during the selective sweep. (A-ii) illustrates interaction of the growth and decay factors introduced in Eq. S1, with the red line describing overall effect of selection and recombination on LD. The vertical dashed line points to the time when the LD value starts to decrease below original LD. (B) Alternatively, we can fix time, and find the window-size at which LD decays below the original LD (Eq. S3). The plot shows the window size as a function of  $Ns$  (20,100,200,500), after fixing other model parameters to match *D. melanogaster* E&R experiments ( $N = 250$ ,  $r = 2 \times 10^8$ ,  $\tau = 59$ ).



Table S1: **Average of power for detecting selection.**

| Hard Sweep |        |           | Soft Sweep |        |           |
|------------|--------|-----------|------------|--------|-----------|
| $\lambda$  | Method | Avg Power | $\lambda$  | Method | Avg Power |
| 300        | CLEAR  | 34        | 300        | CLEAR  | 69        |
| 300        | CMH    | 12        | 300        | CMH    | 69        |
| 300        | FIT    | 2         | 300        | GP     | 61        |
| 300        | GP     | 0         | 300        | FIT    | 8         |
| 100        | CLEAR  | 31        | 100        | CLEAR  | 67        |
| 100        | CMH    | 4         | 100        | CMH    | 60        |
| 100        | FIT    | 2         | 100        | GP     | 59        |
| 100        | GP     | 0         | 100        | FIT    | 1         |
| 30         | CLEAR  | 20        | 30         | CLEAR  | 57        |
| 30         | FIT    | 2         | 30         | GP     | 53        |
| 30         | CMH    | 0         | 30         | CMH    | 39        |
| 30         | GP     | 0         | 30         | FIT    | 3         |

Average power is computed for 8000 simulations with  $s \in \{0.025, 0.05, 0.075, 0.1\}$ . Frequency Increment Test (FIT), Gaussian Process (GP), CLEAR ( $\mathcal{H}$  statistic) and Cochran Mantel Haenszel (CMH) are compared for different initial carrier frequency  $\nu_0$ . For all sequencing coverages, CLEAR outperform other methods. When coverage is not high ( $\lambda \in \{30, 100\}$ ) and initial frequency is low (hard sweep), CLEAR significantly perform better than others.

Table S2: **Mean and standard deviation of the distribution of bias ( $s - \hat{s}$ ) of 8000 simulations with coverage  $\lambda = 100\times$  and  $s \in \{0.025, 0.05, 0.075, 0.1\}$ .**

| Method | $\nu_0$ | Mean  | STD   |
|--------|---------|-------|-------|
| GP     | 0.005   | 0.073 | 0.061 |
| CLEAR  | 0.005   | 0.016 | 0.035 |
| GP     | 0.1     | 0.002 | 0.016 |
| CLEAR  | 0.1     | 0.002 | 0.013 |

Table S3: **Overlapping genes with the 174 candidate variants.**

| Interval | Position          | FBgn        | Gene Name | GO Function                                                                               |
|----------|-------------------|-------------|-----------|-------------------------------------------------------------------------------------------|
| I1       | X:1.567-1.824M    | FBgn0023531 | CG32809   | NA                                                                                        |
|          |                   | FBgn0023130 | a6        | embryonic development via the syncytial blastoderm                                        |
|          |                   | FBgn0025378 | CG3795    | serine-type endopeptidase activity                                                        |
|          |                   | FBgn0025391 | Scgdelta  | heart contraction, mesoderm development                                                   |
|          |                   | FBgn0261548 | CG42666   | NA                                                                                        |
|          |                   | FBgn0026086 | Adar      | RNA editing                                                                               |
|          |                   | FBgn0026090 | CG14812   | negative regulation of cysteine-type endopeptidase activity involved in apoptotic process |
| I2       | X:7.175-7.241M    | FBgn0023522 | CG11596   | NA                                                                                        |
|          |                   | FBgn0029941 | CG1677    | NA                                                                                        |
|          |                   | FBgn0029944 | Dok       | stress activated protein kinase signaling                                                 |
| I3       | 2L:16.878-16.993M | FBgn0029946 | CG15034   | NA                                                                                        |
|          |                   | FBgn0052832 | CG32832   | mitochondrial pyruvate transport                                                          |
|          |                   | FBgn0032618 | CG31743   | sulfotransferase activity                                                                 |
|          |                   | FBgn0085342 | CG34313   | NA                                                                                        |
|          |                   | FBgn0040985 | CG6115    | NA                                                                                        |
|          |                   | FBgn0261671 | tweek     | synaptic vesicle endocytosis                                                              |
|          |                   | FBgn0026150 | ApepP     | metalloaminopeptidase activity                                                            |
| I4       | 2R:2.725-2.810M   | FBgn0262355 | CR43053   | NA                                                                                        |
|          |                   | FBgn0053179 | beat-IIIb | NA                                                                                        |
|          |                   | FBgn0040674 | CG9445    | NA                                                                                        |
|          |                   | FBgn0265935 | coro      | adult somatic muscle development                                                          |
|          |                   | FBgn0033110 | CG9447    | NA                                                                                        |
|          |                   | FBgn0033113 | Spn42Dc   | Inhibitory Serpins                                                                        |
| I5       | 3L:14.362-14.514M | FBgn0028988 | Spn42Dd   | Inhibitory Serpins                                                                        |
|          |                   | FBgn0033115 | Spn42De   | Inhibitory Serpins                                                                        |
|          |                   | FBgn0050158 | CG30158   | small GTPase mediated signal transduction                                                 |
|          |                   | FBgn0036421 | CG13481   | ubiquitin-protein transferase activity                                                    |
|          |                   | FBgn0262580 | CG43120   | NA                                                                                        |
| I5       | 3L:14.362-14.514M | FBgn0036422 | CG3868    | NA                                                                                        |
|          |                   | FBgn0087007 | bbg       | PDZ domain                                                                                |
|          |                   | FBgn0036426 | CG9592    | NA                                                                                        |
|          |                   | FBgn0036427 | CG4613    | serine-type endopeptidase activity                                                        |

## References

- [1] Alan Agresti and Maria Kateri. *Categorical data analysis*. Springer, 2011.
- [2] Eric C Anderson, Ellen G Williamson, and Elizabeth A Thompson. Monte Carlo evaluation of the likelihood for Ne from temporally spaced samples. *Genetics*, 156(4):2109–2118, 2000.
- [3] Frédéric Arieu, Benoit Witkowski, Chanaki Amaratunga, Johann Beghain, Anne-Claire Langlois, Nimol Khim, Saorin Kim, Valentine Duru, Christiane Bouchier, Laurence Ma, and Others. A molecular marker of artemisinin-resistant Plasmodium falciparum malaria. *Nature*, 505(7481):50–55, 2014.
- [4] James G Baldwin-Brown, Anthony D Long, and Kevin R Thornton. The power to detect quantitative trait loci using resequenced, experimentally evolved populations of diploid, sexual organisms. *Molecular biology and evolution*, page msu048, 2014.
- [5] Rowan D H Barrett, Sean M Rogers, and Dolph Schluter. Natural selection on a major armor gene in threespine stickleback. *Science*, 322(5899):255–257, 2008.
- [6] Jeffrey E Barrick and Richard E Lenski. Genome dynamics during experimental evolution. *Nature Reviews Genetics*, 14(12):827–839, 2013.
- [7] Jeffrey E Barrick, Dong Su Yu, Sung Ho Yoon, Haeyoung Jeong, Tae Kwang Oh, Dominique Schneider, Richard E Lenski, and Jihyun F Kim. Genome evolution and adaptation in a long-term experiment with Escherichia coli. *Nature*, 461(7268):1243–1247, 2009.
- [8] Alan O Bergland, Emily L Behrman, Katherine R O’Brien, Paul S Schmidt, and Dmitri A Petrov. Genomic evidence of rapid and stable adaptive oscillations over seasonal time scales in Drosophila. *PLoS Genet*, 10(11):e1004775, 2014.
- [9] Todd Bersaglieri, Pardis C Sabeti, Nick Patterson, Trisha Vanderploeg, Steve F Schaffner, Jared A Drake, Matthew Rhodes, David E Reich, and Joel N Hirschhorn. Genetic signatures of strong recent positive selection at the lactase gene. *The American Journal of Human Genetics*, 74(6):1111–1120, 2004.
- [10] Jonathan P Bollback and John P Huelsenbeck. Clonal interference is alleviated by high mutation rates in large populations. *Molecular biology and evolution*, 24(6):1397–1406, 2007.
- [11] Jonathan P Bollback, Thomas L York, and Rasmus Nielsen. Estimation of 2Nes from temporal allele frequency data. *Genetics*, 179(1):497–502, 2008.
- [12] Adam R Boyko, Scott H Williamson, Amit R Indap, Jeremiah D Degenhardt, Ryan D Hernandez, Kirk E Lohmueller, Mark D Adams, Steffen Schmidt, John J Sninsky, Shamil R Sunyaev, and Others. Assessing the evolutionary impact of amino acid mutations in the human genome. *PLoS Genet*, 4(5):e1000083, 2008.
- [13] Molly K Burke, Joseph P Dunham, Parvin Shahrestani, Kevin R Thornton, Michael R Rose, and Anthony D Long. Genome-wide analysis of a long-term evolution experiment with Drosophila. *Nature*, 467(7315):587–590, 2010.
- [14] Molly K Burke, Gianni Liti, and Anthony D Long. Standing genetic variation drives repeatable experimental evolution in outcrossing populations of Saccharomyces cerevisiae. *Molecular biology and evolution*, page msu256, 2014.

- [15] P Daborn, S Boundy, J Yen, B Pittendrigh, and Others. DDT resistance in *Drosophila* correlates with Cyp6g1 over-expression and confers cross-resistance to the neonicotinoid imidacloprid. *Molecular Genetics and Genomics*, 266(4):556–563, 2001.
- [16] Rachel Daniels, Hsiao-Han Chang, Papa Diogoye Séne, Danny C Park, Daniel E Neafsey, Stephen F Schaffner, Elizabeth J Hamilton, Amanda K Lukens, Daria Van Tyne, Souleymane Mboup, and Others. Genetic surveillance detects both clonal and epidemic transmission of malaria following enhanced intervention in Senegal. *PLoS One*, 8(4):e60780, 2013.
- [17] Vincent J Deneff and Jillian F Banfield. In situ evolutionary rate measurements show ecological success of recently emerged bacterial hybrids. *Science*, 336(6080):462–466, 2012.
- [18] Michael M Desai and Joshua B Plotkin. The polymorphism frequency spectrum of finitely many sites under selection. *Genetics*, 180(4):2175–2191, 2008.
- [19] Richard Durbin, Sean R Eddy, Anders Krogh, and Graeme Mitchison. *Biological sequence analysis: probabilistic models of proteins and nucleic acids*. Cambridge university press, 1998.
- [20] Warren J Ewens. *Mathematical Population Genetics 1: Theoretical Introduction*, volume 27. Springer Science & Business Media, 2012.
- [21] Gregory Ewing and Joachim Hermisson. MSMS: a coalescent simulation program including recombination, demographic structure and selection at a single locus. *Bioinformatics*, 26(16):2064–2065, 2010.
- [22] Shaohua Fan, Matthew E B Hansen, Yancy Lo, and Sarah A Tishkoff. Going global by adapting local: A review of recent human adaptation. *Science*, 354(6308):54–59, 2016.
- [23] Alison F Feder, Sergey Kryazhimskiy, and Joshua B Plotkin. Identifying signatures of selection in genetic time series. *Genetics*, 196(2):509–522, 2014.
- [24] Alison F Feder, Soo-Yon Rhee, Susan P Holmes, Robert W Shafer, Dmitri A Petrov, and Pleuni S Pennings. More effective drugs lead to harder selective sweeps in the evolution of drug resistance in HIV-1. *eLife*, 5, jan 2016.
- [25] Anna-Sophie Fiston-Lavier, Nadia D Singh, Mikhail Lipatov, and Dmitri A Petrov. *Drosophila melanogaster* recombination rate calculator. *Gene*, 463(1):18–20, 2010.
- [26] Susanne U Fransen, Viola Nolte, Ray Tobler, and Christian Schlötterer. Patterns of linkage disequilibrium and long range hitchhiking in evolving experimental *Drosophila melanogaster* populations. *Molecular biology and evolution*, 32(2):495–509, 2015.
- [27] Michael M Gottesman. Mechanisms of cancer drug resistance. *Annual review of medicine*, 53(1):615–627, 2002.
- [28] Matthew Hegreness, Noam Shores, Daniel Hartl, and Roy Kishony. An equivalence principle for the incorporation of favorable mutations in asexual populations. *Science*, 311(5767):1615–1617, 2006.
- [29] Christopher J R Illingworth and Ville Mustonen. Distinguishing driver and passenger mutations in an evolutionary history categorized by interference. *Genetics*, 189(3):989–1000, 2011.

- [30] Christopher J R Illingworth, Leopold Parts, Stephan Schiffels, Gianni Liti, and Ville Mustonen. Quantifying selection acting on a complex trait using allele frequency time series data. *Molecular biology and evolution*, 29(4):1187–1197, 2012.
- [31] Minako Izutsu, Atsushi Toyoda, Asao Fujiyama, Kiyokazu Agata, and Naoyuki Fuse. Dynamics of Dark-Fly Genome Under Environmental Selections. *G3: Genes— Genomes— Genetics*, pages g3—115, 2015.
- [32] Aashish R Jha, Cecelia M Miles, Nodia R Lippert, Christopher D Brown, Kevin P White, and Martin Kreitman. Whole-genome resequencing of experimental populations reveals polygenic basis of egg-size variation in *Drosophila melanogaster*. *Molecular biology and evolution*, 32(10):2616–2632, 2015.
- [33] Ágnes Jónás, Thomas Taus, Carolin Kosiol, Christian Schlötterer, and Andreas Futschik. Estimating the Effective Population Size from Temporal Allele Frequency Changes in Experimental Evolution. *Genetics*, aug 2016.
- [34] Tadeusz J Kawecki, Richard E Lenski, Dieter Ebert, Brian Hollis, Isabelle Olivieri, and Michael C Whitlock. Experimental evolution. *Trends in ecology & evolution*, 27(10):547–560, 2012.
- [35] Robert Kofler and Christian Schlötterer. A guide for the design of evolve and resequencing studies. *Molecular biology and evolution*, page mst221, 2013.
- [36] Toshio Kosaka and Kazuo Ikeda. Reversible Blockage of Membrane Retrieval and Endocytosis in the Garland Cell of the Temperature-sensitive. *The Journal of cell biology*, 97, 1983.
- [37] Gregory I Lang, David Botstein, and Michael M Desai. Genetic variation and the fate of beneficial mutations in asexual populations. *Genetics*, 188(3):647–661, 2011.
- [38] Gregory I Lang, Daniel P Rice, Mark J Hickman, Erica Sodergren, George M Weinstock, David Botstein, and Michael M Desai. Pervasive genetic hitchhiking and clonal interference in forty evolving yeast populations. *Nature*, 500(7464):571–574, 2013.
- [39] Quan Long, Fernando A Rabanal, Dazhe Meng, Christian D Huber, Ashley Farlow, Alexander Platzer, Qingrun Zhang, Bjarni J Vilhjálmsson, Arthur Korte, Viktoria Nizhynska, and Others. Massive genomic variation and strong selection in *Arabidopsis thaliana* lines from Sweden. *Nature genetics*, 45(8):884–890, 2013.
- [40] Anna-Sapfo Malaspinas, Orestis Malaspinas, Steven N Evans, and Montgomery Slatkin. Estimating allele age and selection coefficient from time-serial data. *Genetics*, 192(2):599–607, 2012.
- [41] Frank Maldarelli, Mary Kearney, Sarah Palmer, Robert Stephens, JoAnn Mican, Michael A Polis, Richard T Davey, Joseph Kovacs, Wei Shao, Diane Rock-Kress, and Others. HIV populations are large and accumulate high genetic diversity in a nonlinear fashion. *Journal of virology*, 87(18):10313–10323, 2013.
- [42] Nelson E Martins, Vítor G Faria, Viola Nolte, Christian Schlötterer, Luis Teixeira, Élio Sucena, and Sara Magalhães. Host adaptation to viruses relies on few genes with different cross-resistance properties. *Proceedings of the National Academy of Sciences*, 111(16):5938–5943, 2014.

- [43] Iain Mathieson and Gil McVean. Estimating selection coefficients in spatially structured populations from time series data of allele frequencies. *Genetics*, 193(3):973–984, 2013.
- [44] Shalini Nair, Denae Nash, Daniel Sudimack, Anchalee Jaidee, Marion Barends, Anne-Catrin Uhlemann, Sanjeev Krishna, François Nosten, and Tim J C Anderson. Recurrent gene amplification and soft selective sweeps during evolution of multidrug resistance in malaria parasites. *Molecular Biology and Evolution*, 24(2):562–573, 2007.
- [45] Rasmus Nielsen, Scott Williamson, Yuseob Kim, Melissa J Hubisz, Andrew G Clark, and Carlos Bustamante. Genomic scans for selective sweeps using SNP data. *Genome research*, 15(11):1566–1575, 2005.
- [46] Pablo Orozco-ter Wengel, Martin Kapun, Viola Nolte, Robert Kofler, Thomas Flatt, and Christian Schlötterer. Adaptation of *Drosophila* to a novel laboratory environment reveals temporally heterogeneous trajectories of selected alleles. *Molecular ecology*, 21(20):4931–4941, 2012.
- [47] Tugce Oz, Aysegul Guvenek, Sadik Yildiz, Enes Karaboga, Yusuf Talha Tamer, Nirva Mumcuyan, Vedat Burak Ozan, Gizem Hazal Senturk, Murat Cokol, Pamela Yeh, and Others. Strength of selection pressure is an important parameter contributing to the complexity of antibiotic resistance evolution. *Molecular biology and evolution*, page msu191, 2014.
- [48] Bo Peng and Marek Kimmel. simuPOP: a forward-time population genetics simulation environment. *Bioinformatics*, 21(18):3686–3687, 2005.
- [49] Edward Pollak. A new method for estimating the effective population size from allele frequency changes. *Genetics*, 104(3):531–548, 1983.
- [50] Brian J Reid, Rumen Kostadinov, and Carlo C Maley. New strategies in Barrett’s esophagus: integrating clonal evolutionary theory with clinical management. *Clinical Cancer Research*, 17(11):3512–3519, 2011.
- [51] Silvia C Remolina, Peter L Chang, Jeff Leips, Sergey V Nuzhdin, and Kimberly A Hughes. Genomic basis of aging and life-history evolution in *Drosophila melanogaster*. *Evolution*, 66(11):3390–3403, 2012.
- [52] Stanley A Sawyer and Daniel L Hartl. Population genetics of polymorphism and divergence. *Genetics*, 132(4):1161–1176, 1992.
- [53] Christian Schlötterer, R Kofler, E Versace, R Tobler, and S U Franssen. Combining experimental evolution with next-generation sequencing: a powerful tool to study adaptation from standing genetic variation. *Heredity*, 114(5):431–440, 2015.
- [54] Joshua G Schraiber, Steven N Evans, and Montgomery Slatkin. Bayesian inference of natural selection from allele frequency time series. *Genetics*, 203(1):493–511, 2016.
- [55] Tatum S Simonson, Yingzhong Yang, Chad D Huff, Haixia Yun, Ga Qin, David J Witherspoon, Zhenzhong Bai, Felipe R Lorenzo, Jinchuan Xing, Lynn B Jorde, and Others. Genetic evidence for high-altitude adaptation in Tibet. *Science*, 329(5987):72–75, 2010.
- [56] Brad Spellberg, Robert Guidos, David Gilbert, John Bradley, Helen W Boucher, W Michael Scheld, John G Bartlett, John Edwards, Infectious Diseases Society of America, and Others.



- The epidemic of antibiotic-resistant infections: a call to action for the medical community from the Infectious Diseases Society of America. *Clinical Infectious Diseases*, 46(2):155–164, 2008.
- [57] Matthias Steinrücken, Anand Bhaskar, and Yun S Song. A novel spectral method for inferring general diploid selection from time series genetic data. *The annals of applied statistics*, 8(4):2203, 2014.
- [58] Wolfgang Stephan, Yun S Song, and Charles H Langley. The hitchhiking effect on linkage disequilibrium between linked neutral loci. *Genetics*, 172(4):2647–2663, 2006.
- [59] John D Storey and Robert Tibshirani. Statistical significance for genomewide studies. *Proceedings of the National Academy of Sciences*, 100(16):9440–9445, 2003.
- [60] Jonathan Terhorst, Christian Schlötterer, and Yun S Song. Multi-locus Analysis of Genomic Time Series Data from Experimental Evolution. *PLoS Genet*, 11(4):e1005069, 2015.
- [61] Ray Tobler, Susanne U Franssen, Robert Kofler, Pablo Orozco-terWengel, Viola Nolte, Joachim Hermisson, and Christian Schlötterer. Massive habitat-specific genomic response in *D. melanogaster* populations during experimental evolution in hot and cold environments. *Molecular biology and evolution*, 31(2):364–375, 2014.
- [62] Hande Topa, Ágnes Jónás, Robert Kofler, Carolin Kosiol, and Antti Honkela. Gaussian process test for high-throughput sequencing time series: application to experimental evolution. *Bioinformatics*, page btv014, 2015.
- [63] Thomas L Turner, Andrew D Stewart, Andrew T Fields, William R Rice, and Aaron M Tarone. Population-based resequencing of experimentally evolved populations reveals the genetic basis of body size variation in *Drosophila melanogaster*. *PLoS Genet*, 7(3):e1001336, 2011.
- [64] Jinliang Wang. A pseudo-likelihood method for estimating effective population size from temporally spaced samples. *Genetical research*, 78(03):243–257, 2001.
- [65] Robin S Waples. A generalized approach for estimating effective population size from temporal changes in allele frequency. *Genetics*, 121(2):379–391, 1989.
- [66] David Williams and David Williams. *Weighing the odds: a course in probability and statistics*, volume 548. Springer, 2001.
- [67] Ellen G Williamson and Montgomery Slatkin. Using maximum likelihood to estimate population size from temporal changes in allele frequencies. *Genetics*, 152(2):755–761, 1999.
- [68] Mark A Winters, Robert M Lloyd Jr, Robert W Shafer, Michael J Kozal, Michael D Miller, and Mark Holodniy. Development of elvitegravir resistance and linkage of integrase inhibitor mutations with protease and reverse transcriptase resistance mutations. *PloS one*, 7(7):e40514, 2012.
- [69] Xin Yi, Yu Liang, Emilia Huerta-Sanchez, Xin Jin, Zha Xi Ping Cuo, John E Pool, Xun Xu, Hui Jiang, Nicolas Vinckenbosch, Thorfinn Sand Korneliusen, and Others. Sequencing of 50 human exomes reveals adaptation to high altitude. *Science*, 329(5987):75–78, 2010.
- [70] Hiba Zahreddine and K L Borden. Mechanisms and insights into drug resistance in cancer. *Front Pharmacol*, 4(28.10):3389, 2013.

- [71] Dan Zhou, Nitin Udpa, Merrill Gersten, DeeAnn W Visk, Ali Bashir, Jin Xue, Kelly A Frazer, James W Posakony, Shankar Subramaniam, Vineet Bafna, and Gabriel G. Haddad. Experimental selection of hypoxia-tolerant *Drosophila melanogaster*. *Proceedings of the National Academy of Sciences*, 108(6):2349–2354, 2011.
